# Supplementary material for: Synthesis of helical aluminium catalysts for cyclic carbonate formation
Source: Royal Society of Chemistry journal article supplement (doi:10.1039/c9dt00323a), 2019-01-01
Supplement: c9dt00323a1.pdf [file c9dt00323a1.pdf]

## Supporting Information Table of Contents

### Synthesis of Helical Aluminium Catalysts for Cyclic Carbonate Formation

|                                                                                                                                                                                                                                                                                     |     |
|-------------------------------------------------------------------------------------------------------------------------------------------------------------------------------------------------------------------------------------------------------------------------------------|-----|
| <b>Figure S1.</b> NMR Spectra for complex <b>7</b> in C <sub>6</sub> D <sub>6</sub>                                                                                                                                                                                                 | S1  |
| Crystallographic data and selected interatomic distances and angles for compound <b>1</b>                                                                                                                                                                                           | S3  |
| <b>Table S1.</b> Crystallographic data for compound <b>1</b>                                                                                                                                                                                                                        | S3  |
| <b>Table S2.</b> Selected interatomic distances and angles for compound <b>1</b>                                                                                                                                                                                                    | S4  |
| <b>Figure S2.</b> <i>M</i> and <i>P</i> enantiomers of compound <b>1</b> in the unit cell.                                                                                                                                                                                          | S5  |
| <b>Table S3.</b> Non-covalent interactions found in complex <b>1</b> . $\beta$ is the angle formed by H–centroid and H–plane lines in the case of the CH $\cdots\pi$ interaction. $\alpha$ is the dihedral angle formed by the plane of the two rings of the $\pi$ – $\pi$ stacking | S5  |
| General procedures for cyclic carbonates synthesis and polyether-polycarbonates                                                                                                                                                                                                     | S6  |
| NMR Spectra for styrene carbonate <b>10a</b> in CDCl <sub>3</sub>                                                                                                                                                                                                                   | S7  |
| NMR Spectra for propylene carbonate <b>10b</b> in CDCl <sub>3</sub>                                                                                                                                                                                                                 | S8  |
| NMR Spectra for 1,2-butylene carbonate <b>10c</b> in CDCl <sub>3</sub>                                                                                                                                                                                                              | S9  |
| NMR Spectra for 1,2-hexylene carbonate <b>10d</b> in CDCl <sub>3</sub>                                                                                                                                                                                                              | S10 |
| NMR Spectra for 1,2-decylene carbonate <b>10e</b> in CDCl <sub>3</sub>                                                                                                                                                                                                              | S11 |
| NMR Spectra for 4-chlorostyrene carbonate <b>10f</b> in CDCl <sub>3</sub>                                                                                                                                                                                                           | S12 |
| NMR Spectra for 4-bromostyrene carbonate <b>10g</b> in CDCl <sub>3</sub>                                                                                                                                                                                                            | S13 |
| NMR Spectra for glycerol carbonate <b>10h</b> in DMSO- <i>d</i> <sub>6</sub>                                                                                                                                                                                                        | S14 |
| NMR Spectra for 3-chloropropylene carbonate <b>10i</b> in CDCl <sub>3</sub>                                                                                                                                                                                                         | S15 |
| NMR Spectra for 3-phenoxypropylene carbonate <b>10j</b> in CDCl <sub>3</sub>                                                                                                                                                                                                        | S16 |
| NMR Spectra for cyclopentene carbonate <b>12a</b> in CDCl <sub>3</sub>                                                                                                                                                                                                              | S17 |
| NMR Spectra for <i>cis</i> -2,3-butene carbonate <b>12b</b> in CDCl <sub>3</sub>                                                                                                                                                                                                    | S18 |
| NMR Spectra for <i>trans</i> -2,3-butene carbonate <b>12c</b> in CDCl <sub>3</sub>                                                                                                                                                                                                  | S19 |
| NMR Spectra for <i>trans</i> -1,2-diphenylethylene carbonate <b>12d</b> in CDCl <sub>3</sub>                                                                                                                                                                                        | S20 |
| NMR Spectra for <i>trans</i> -1-phenyl-2-methylethylene carbonate <b>12e</b> in CDCl <sub>3</sub>                                                                                                                                                                                   | S21 |
| <sup>1</sup> H NMR spectrum for polyether-polycarbonate <b>12f</b> derived from CHO and CO <sub>2</sub> in CDCl <sub>3</sub>                                                                                                                                                        | S22 |
| IR NMR spectrum for polyether-polycarbonate <b>12f</b> derived from CHO and CO <sub>2</sub>                                                                                                                                                                                         | S22 |
| References                                                                                                                                                                                                                                                                          | S23 |

**Figure S1.** NMR Spectra for complex **7** in  $C_6D_6$

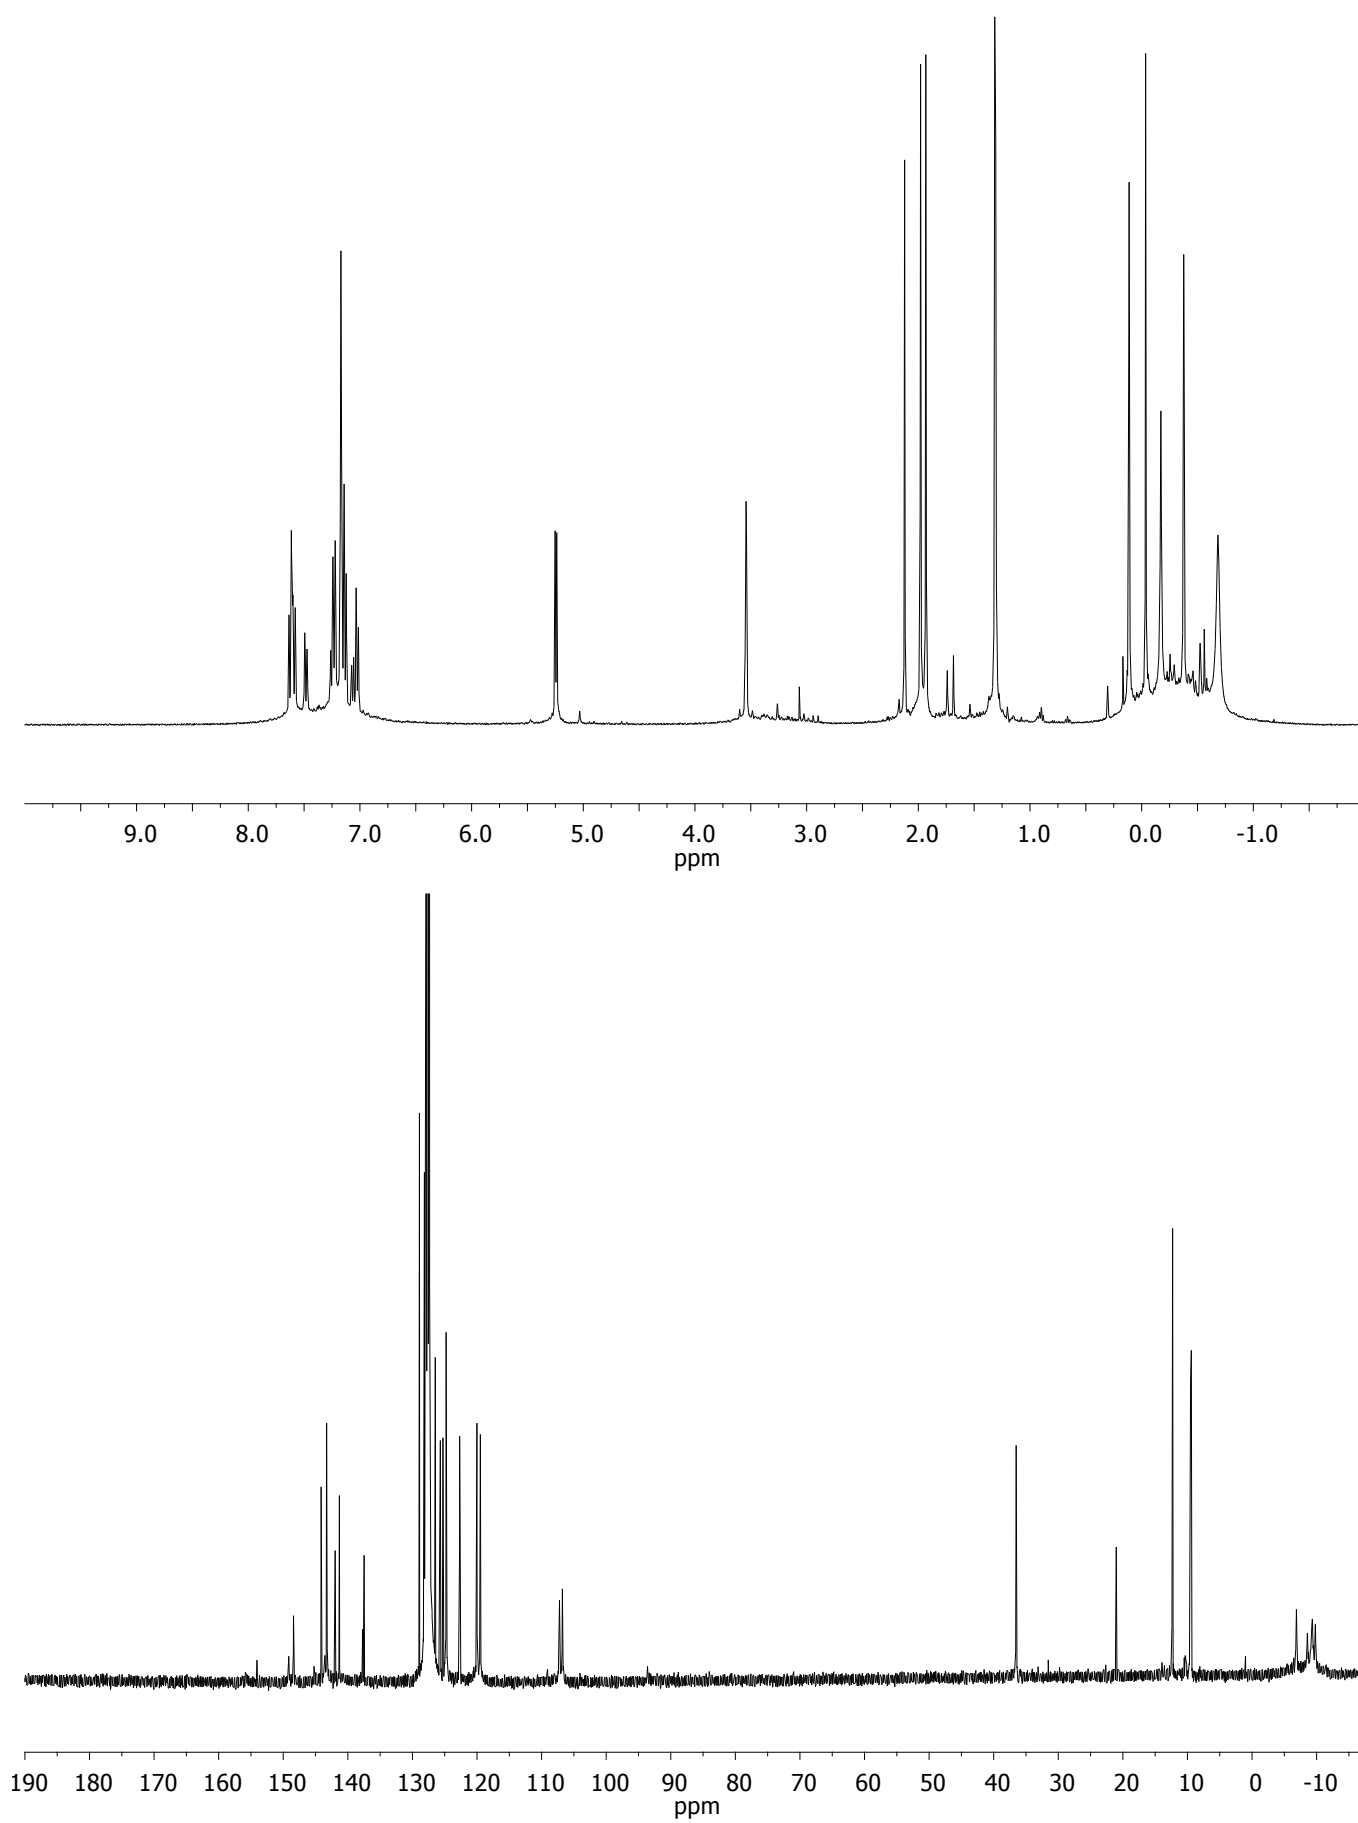

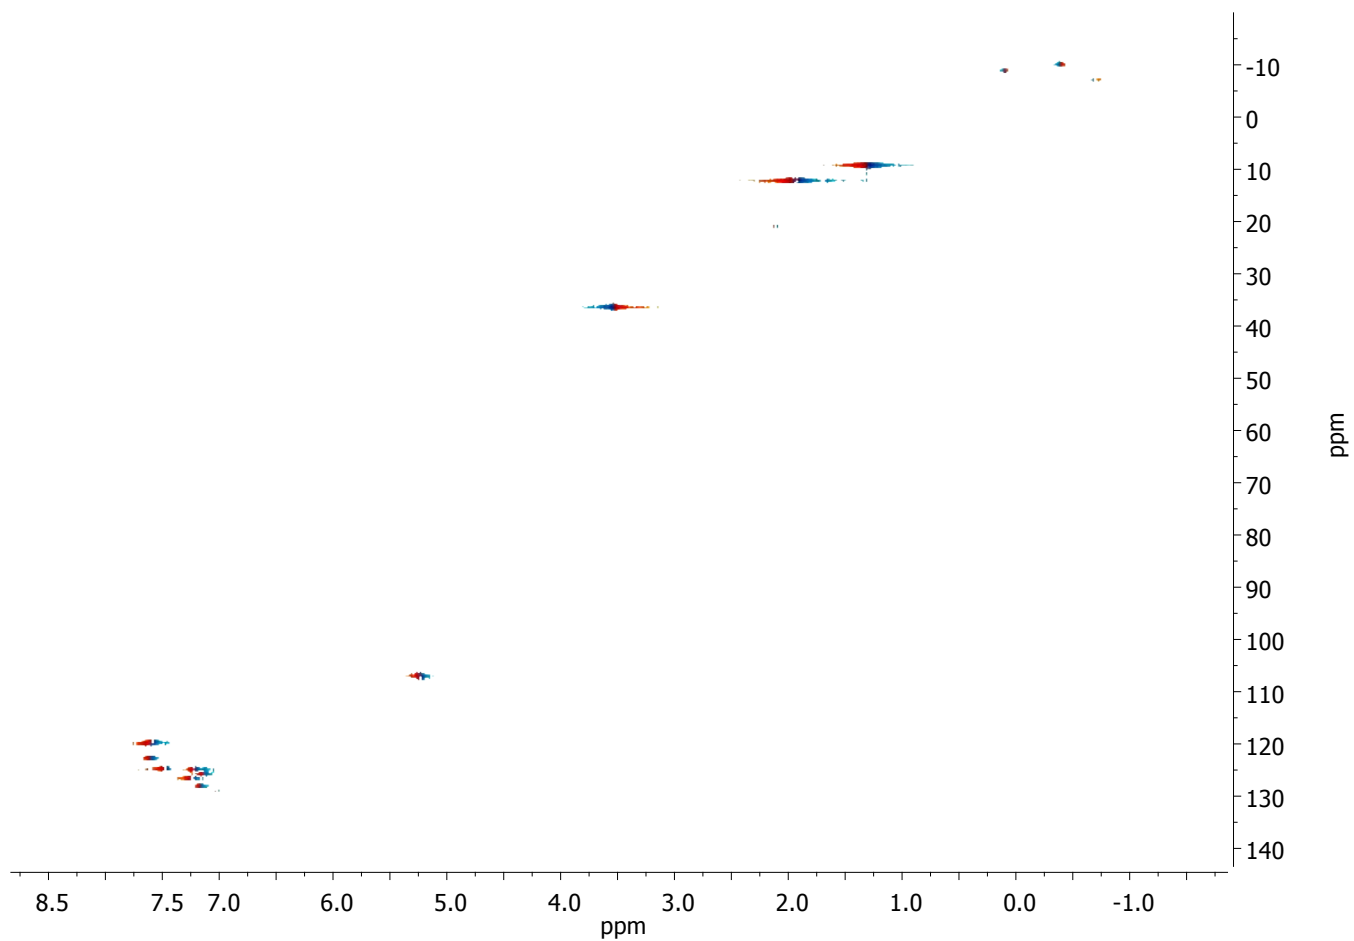

## Crystallographic data and selected interatomic distances and angles for compound **1**

**Table S1.** Crystal data and structure refinement for **1**

| <b>Compound</b>                               | <b>1</b>                                                         |
|-----------------------------------------------|------------------------------------------------------------------|
| Formula                                       | C <sub>40</sub> H <sub>49</sub> Al <sub>2</sub> N <sub>5</sub> S |
| M                                             | 685.86                                                           |
| CCDC                                          | 1884536                                                          |
| Crystal System                                | Monoclinic                                                       |
| Space group                                   | <i>P</i> 2 <sub>1</sub> / <i>c</i>                               |
| <i>T</i> [K]                                  | 100                                                              |
| <i>a</i> [Å]                                  | 16.119(5)                                                        |
| <i>b</i> [Å]                                  | 24.785(5)                                                        |
| <i>c</i> [Å]                                  | 21.326(4)                                                        |
| <i>α</i> [deg]                                | 90                                                               |
| <i>β</i> [deg]                                | 115.151(16)                                                      |
| <i>γ</i> [deg]                                | 90                                                               |
| <i>V</i> [Å <sup>3</sup> ]                    | 7712(3)                                                          |
| <i>Z</i>                                      | 8                                                                |
| Density [gcm <sup>-3</sup> ]                  | 1.181                                                            |
| <i>μ</i> [mm <sup>-1</sup> ]                  | 0.164                                                            |
| Observed reflections                          | 39723                                                            |
| <i>R</i> <sub>int</sub>                       | 0.0636                                                           |
| R1 <sup>b</sup> / wR2 <sup>c</sup> [I>2σ(I)]  | 0.0842 / 0.2258                                                  |
| R1 <sup>b</sup> / wR2 <sup>c</sup> (all data) | 0.1092 / 0.2461                                                  |
| <i>GoF</i>                                    | 1.106                                                            |
| Largest diff. pk and hole [eÅ <sup>-3</sup> ] | 0.995 and -0.554                                                 |

$$^a S = [\sum w(F_0^2 - F_c^2)^2 / (N_{\text{obs}} - N_{\text{para}})]^{1/2}. \quad ^b R_1 = \sum ||F_0| - |F_c|| / \sum |F_0|.$$

$$^c wR_2 = [\sum w(F_0^2 - F_c^2)^2 / \sum wF_0^2]^{1/2} \quad w = 1/[\sigma^2(F_0^2) + (aP)^2 + bP] \quad \text{where } P = (\max(F_0^2, 0) + 2F_c^2)/3$$

**Table S2. Selected interatomic distances and angles for compound 1**

| Bond distances (Å) |          | Bond angles (°)     |          |
|--------------------|----------|---------------------|----------|
| S(1A)–Al(1)        | 2.295(2) | Al(1)–S(1A)–C(14A)  | 97.9(2)  |
| S(1A)–C(14A)       | 1.775(5) | S(1A)–Al(1)–N(1A)   | 95.0(1)  |
| Al(1)–N(1A)        | 1.957(6) | S(1A)–Al(1)–C(1A)   | 118.3(2) |
| Al(1)–C(1A)        | 1.970(6) | S(1A)–Al(1)–C(2A)   | 105.5(2) |
| Al(1)–C(2A)        | 1.955(7) | N(1A)–Al(1)–C(1A)   | 107.3(2) |
| Al(2)–N(4A)        | 1.966(4) | N(1A)–Al(1)–C(2A)   | 112.2(2) |
| Al(2)–N(5A)        | 1.897(5) | C(1A)–Al(1)–C(2A)   | 116.6(3) |
| Al(2)–C(1AA)       | 1.969(5) | N(4A)–Al(2)–N(5A)   | 92.5(2)  |
| Al(2)–C(2AA)       | 1.957(7) | N(4A)–Al(2)–C(1AA)  | 110.5(2) |
| N(1A)–N(2A)        | 1.384(6) | N(4A)–Al(2)–C(2AA)  | 108.5(2) |
| N(1A)–C(4A)        | 1.345(7) | N(5A)–Al(2)–C(1AA)  | 110.9(2) |
| N(2A)–C(6A)        | 1.350(8) | N(5A)–Al(2)–C(2AA)  | 113.9(2) |
| N(2A)–C(13A)       | 1.432(6) | C(1AA)–Al(2)–C(2AA) | 117.7(2) |
| N(3A)–N(4A)        | 1.386(5) | Al(1)–N(1A)–N(2A)   | 118.4(3) |
| N(3A)–C(9A)        | 1.371(6) | Al(1)–N(1A)–C(4A)   | 132.7(4) |
| N(3A)–C(13A)       | 1.429(6) | N(2A)–N(1A)–C(4A)   | 106.1(4) |
| N(4A)–C(11A)       | 1.345(6) | N(1A)–N(2A)–C(6A)   | 110.2(4) |
| N(5A)–C(14A)       | 1.369(5) | N(1A)–N(2A)–C(13A)  | 121.9(4) |
| N(5A)–C(15A)       | 1.421(7) | C(6A)–N(2A)–C(13A)  | 127.6(4) |
|                    |          | N(4A)–N(3A)–C(9A)   | 109.7(4) |
|                    |          | N(4A)–N(3A)–C(13A)  | 121.5(4) |
|                    |          | C(9A)–N(3A)–C(13A)  | 128.8(4) |
|                    |          | Al(2)–N(4A)–N(3A)   | 117.6(3) |
|                    |          | Al(2)–N(4A)–C(11A)  | 133.6(4) |
|                    |          | N(3A)–N(4A)–C(11A)  | 106.7(4) |
|                    |          | Al(2)–N(5A)–C(14A)  | 117.8(3) |
|                    |          | Al(2)–N(5A)–C(15A)  | 120.2(4) |
|                    |          | C(14A)–N(5A)–C(15A) | 120.3(4) |

**Figure S2.** *M* (left) and *P* (right) enantiomers of compound **1** in the unit cell.

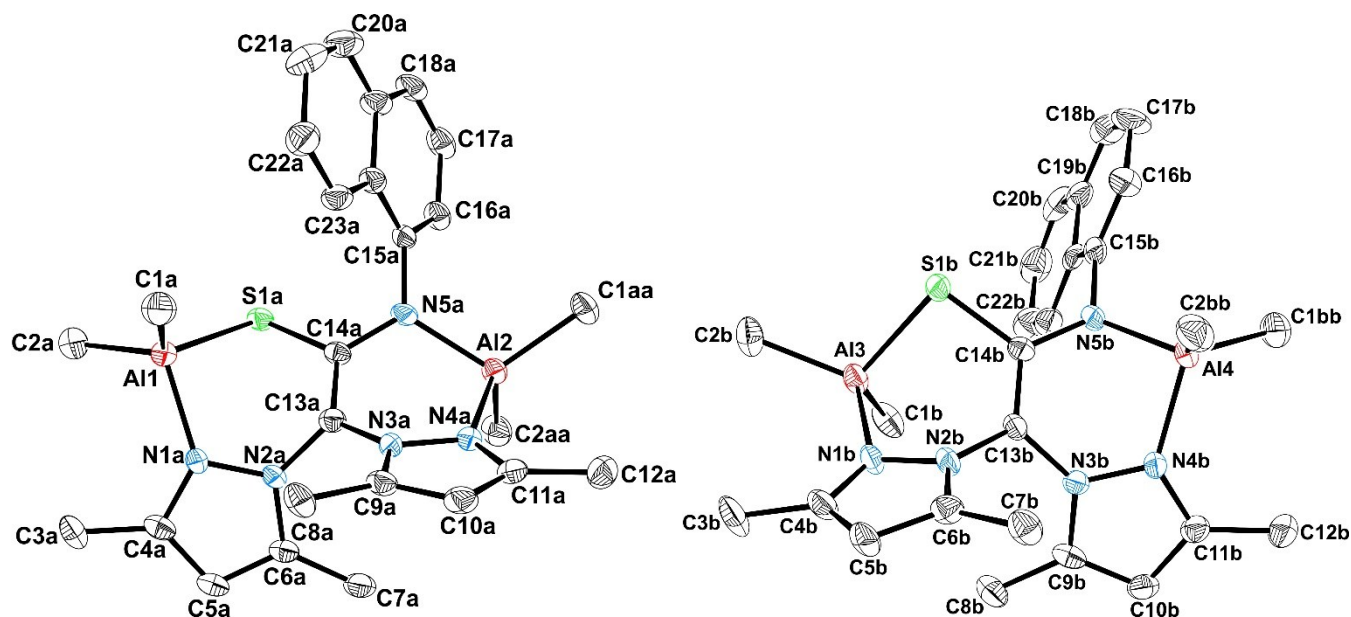

**Table S3.** Non-covalent interactions found in complex **1**.  $\beta$  is the angle formed by H–centroid and H–plane lines in the case of the CH $\cdots$  $\pi$  interaction.  $\alpha$  is the dihedral angle formed by the plane of the two rings of the  $\pi$ – $\pi$  stacking.

| CH $\cdots$ $\pi$ interactions      |                          |                        |            |
|-------------------------------------|--------------------------|------------------------|------------|
| Groups                              | d(H $\cdots$ centroid) Å | d(H $\cdots$ plane) Å  | $\beta$ °  |
| (C7)H7A2 $\cdots$ ph(C15B-C24B)     | 3.3                      | 3.2                    | 16.5       |
| ph(C15A-C24A) $\cdots$ (C7)H7B2     | 3.3                      | 3.2                    | 9.9        |
| $\pi$ – $\pi$ stacking              |                          |                        |            |
| Groups                              | d(Ct $\cdots$ Ct) Å      | d(Ct $\cdots$ plane) Å | $\alpha$ ° |
| pz(N1A-N2A) $\cdots$ ph(C19B-C24B)  | 3.9                      | 3.6                    | 4.6        |
| ph(C19A-C24A) $\cdots$ pz(N1B-N2B)- | 3.9                      | 3.5                    | 4.9        |

## General procedures for cyclic carbonates synthesis and polyether-polycarbonates

### General procedure for synthesis of cyclic carbonates at 1 bar pressure

An epoxide **9a–j** (1.7 mmol), complex **2** (46.3 mg, 83.0  $\mu\text{mol}$ ) and  $\text{Bu}_4\text{NBr}$  (26.7 mg, 83.0  $\mu\text{mol}$ ) were placed in a sample vial fitted with a magnetic stirrer bar and placed in a large conical flask. Cardice pellets were added to the conical flask which was fitted with a rubber stopper pierced by a deflated balloon. The reaction mixture was stirred for 24 h at 25 °C for epoxides **9a–e, h–j** or 50 °C for epoxides **9f, g**. The conversion of epoxide into cyclic carbonate was then determined by analysis of a sample by  $^1\text{H}$ -NMR spectroscopy. The remaining sample was filtered through a plug of silica, eluting with  $\text{CH}_2\text{Cl}_2$  to remove the catalyst. The eluent was evaporated *in vacuo* to give either the pure cyclic carbonate or a mixture of cyclic carbonate and unreacted epoxide. In the latter case, the mixture was purified by flash chromatography using a solvent system of first hexane, then hexane-EtOAc (9:1), then hexane-EtOAc (3:1), then EtOAc to give the pure cyclic carbonate. Cyclic carbonates **10a–j** are all known compounds and the spectroscopic data for samples prepared using complex **2** were consistent with those reported in the literature.<sup>1</sup>

### General procedure for synthesis of cyclic carbonates at 10 bar pressure

An epoxide **11a–e** (1.7 mmol), complex **2** (9.3 mg, 17.0  $\mu\text{mol}$ ) and  $\text{Bu}_4\text{NBr}$  (5.3 mg, 17.0  $\mu\text{mol}$ ) were placed in a stainless steel pressure reactor with a magnetic stirrer bar. The reactor was pressurised to 10 bar of carbon dioxide and the reaction mixture was stirred 50–90 °C for 16 h. Then the conversion of epoxide into cyclic carbonate **11a–e** was determined by analysis of a sample by  $^1\text{H}$ -NMR spectroscopy. The remaining sample was filtered through a plug of silica, eluting with  $\text{CH}_2\text{Cl}_2$  to remove the catalyst. The eluent was evaporated *in vacuo* to give a mixture of cyclic carbonate and unreacted epoxide. The mixture was purified by flash chromatography using a solvent system of first hexane, then hexane-EtOAc (9:1), then hexane-EtOAc (3:1), then EtOAc to give the pure cyclic carbonate. Cyclic carbonates **12a–e** are all known compounds and the spectroscopic data for samples prepared using complex **2** were consistent with those reported in the literature.<sup>1</sup>

### General procedure for synthesis of polyether-polycarbonate

Cyclohexene oxide (0.98 g, 10.0 mmol), complex **2** (0.0–55.7 mg, 0.0–0.1 mmol) and  $\text{Bu}_4\text{NBr}$  (0.0–96.7 mg, 0.0–0.3 mmol) were placed in a stainless steel reactor with a magnetic stirrer bar. The autoclave was sealed, pressurised to 5 bar with  $\text{CO}_2$ , heated to the desired temperature and then pressurised to 10–40 bar with  $\text{CO}_2$ . The reaction mixture was subsequently stirred at 50–90 °C for 24 h. The conversion of cyclohexene oxide into cyclohexene carbonate **12f**, polyether or polyether-polycarbonate was determined by analysis of a sample by  $^1\text{H}$  NMR spectroscopy.<sup>1</sup>

NMR Spectra for styrene carbonate **10a** in CDCl<sub>3</sub>

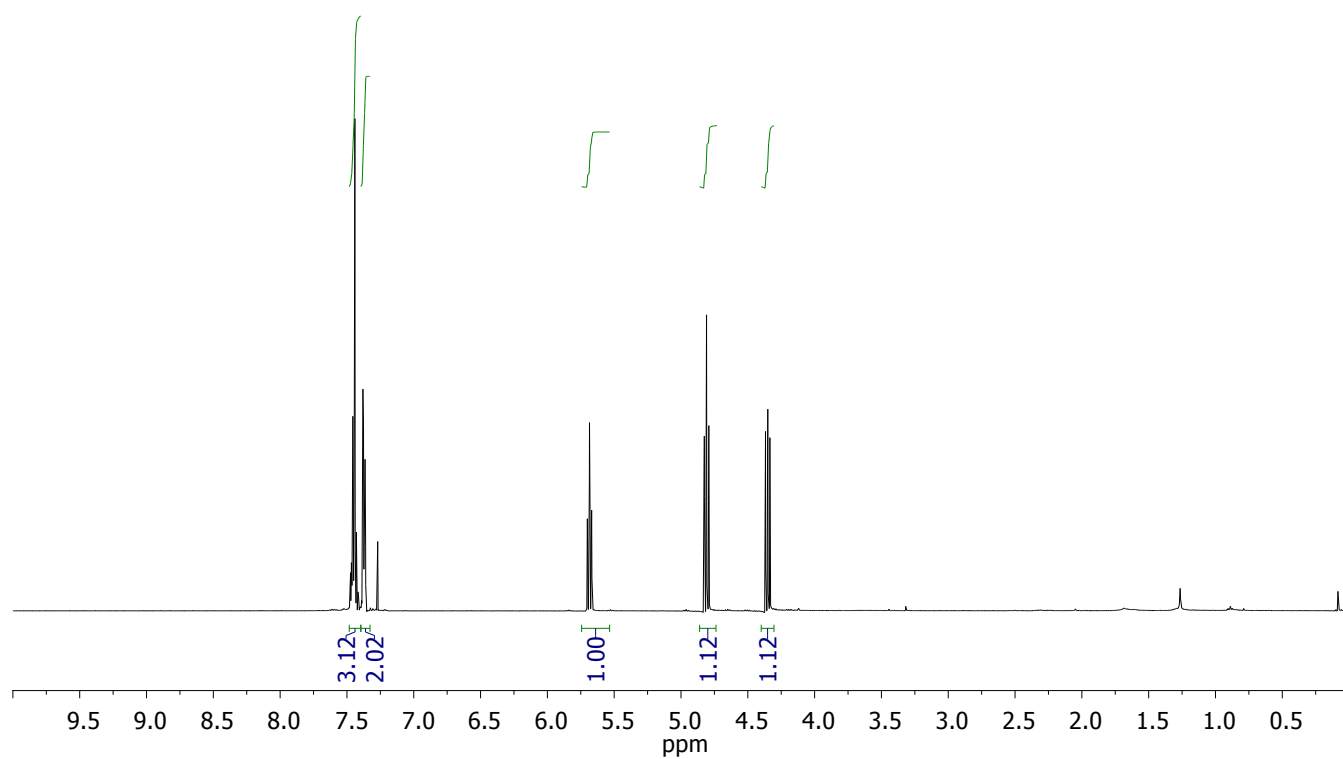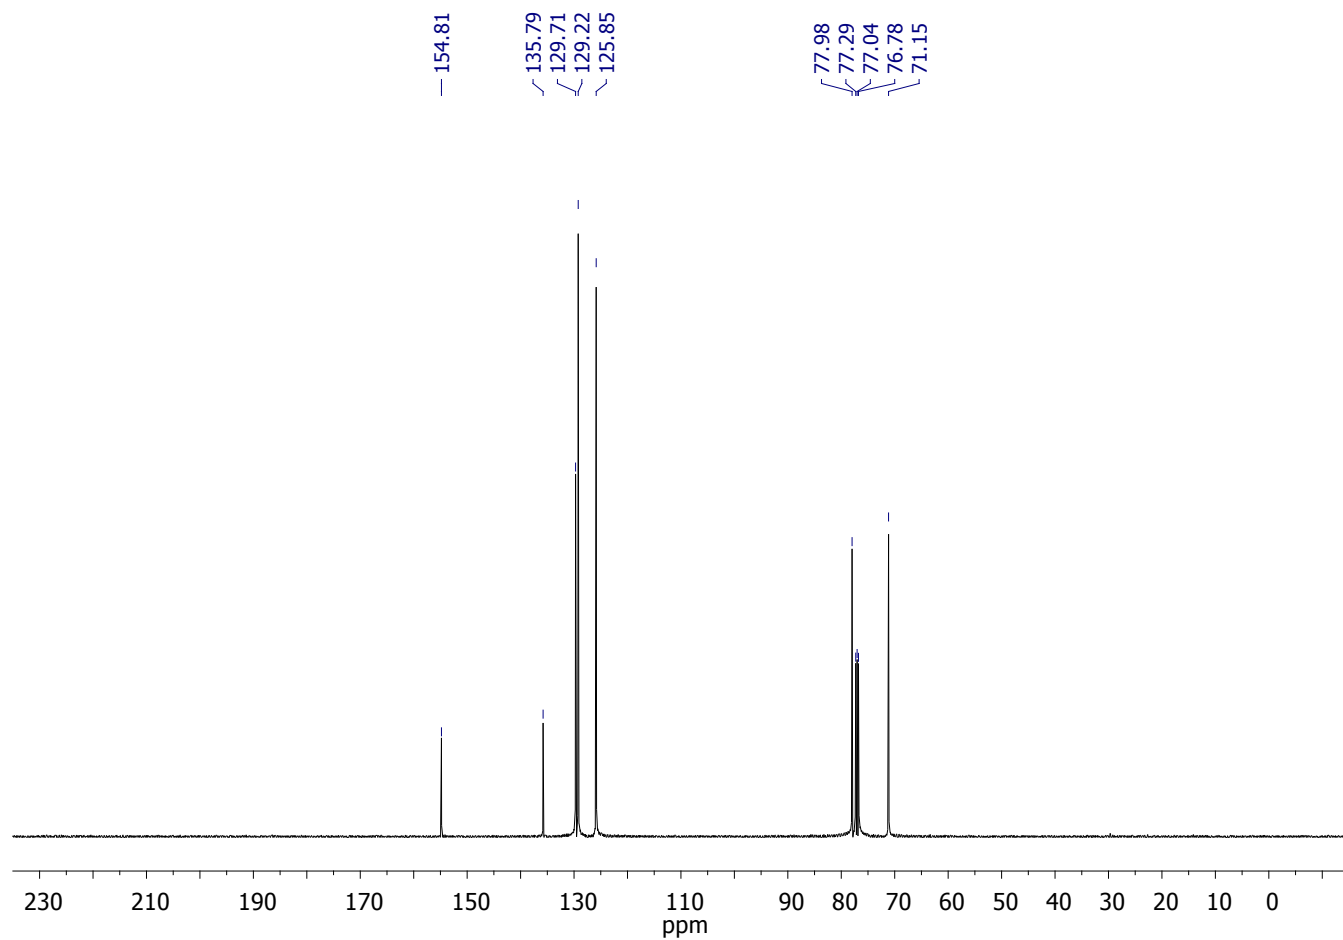



NMR Spectra for propylene carbonate **10b** in CDCl<sub>3</sub>

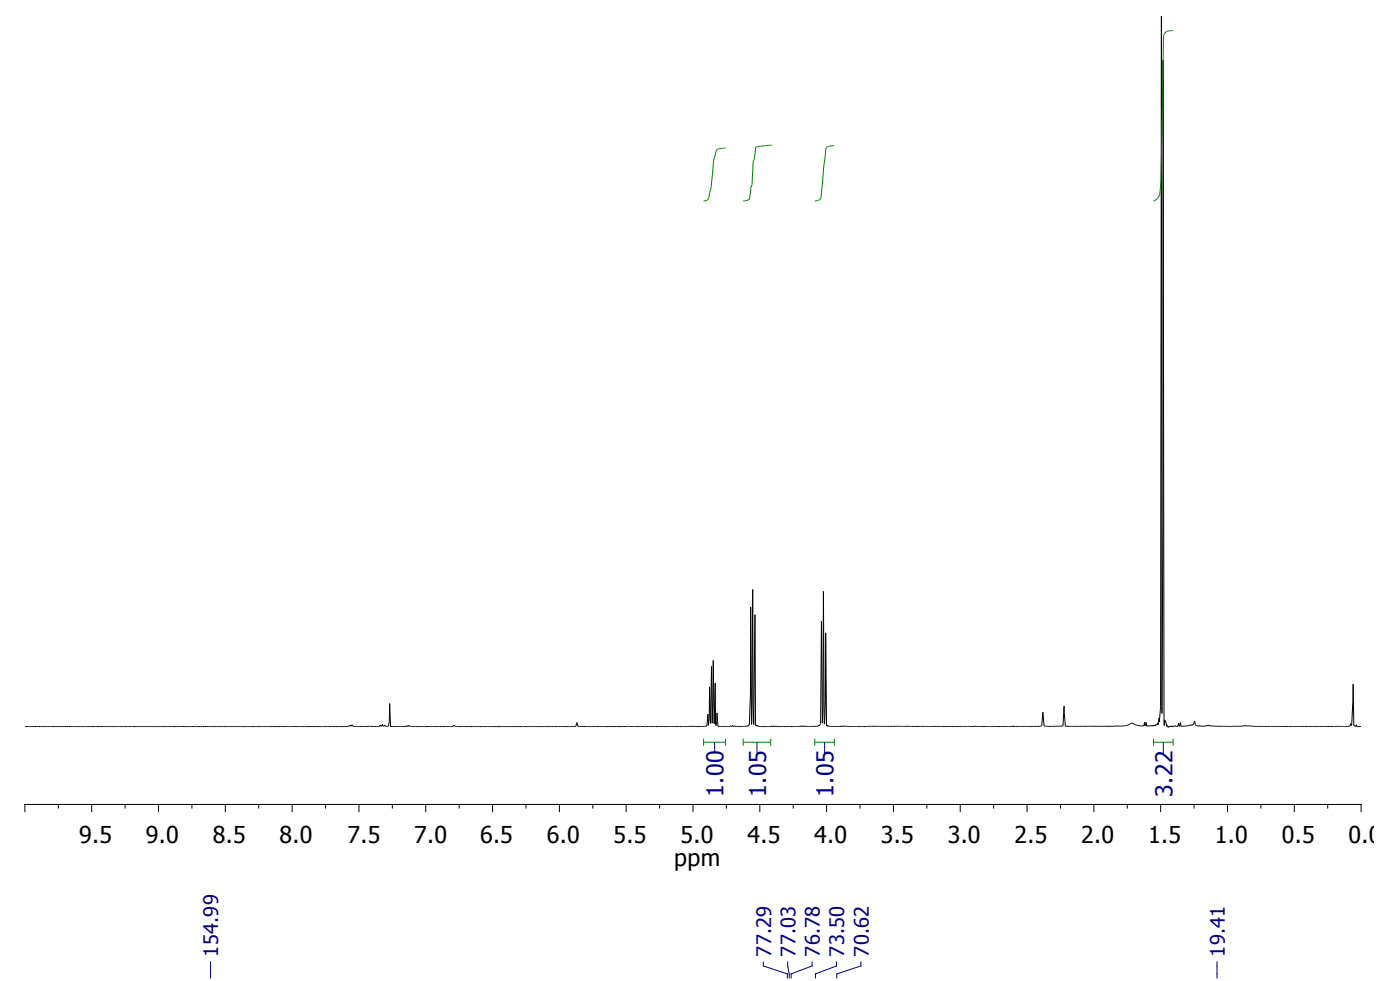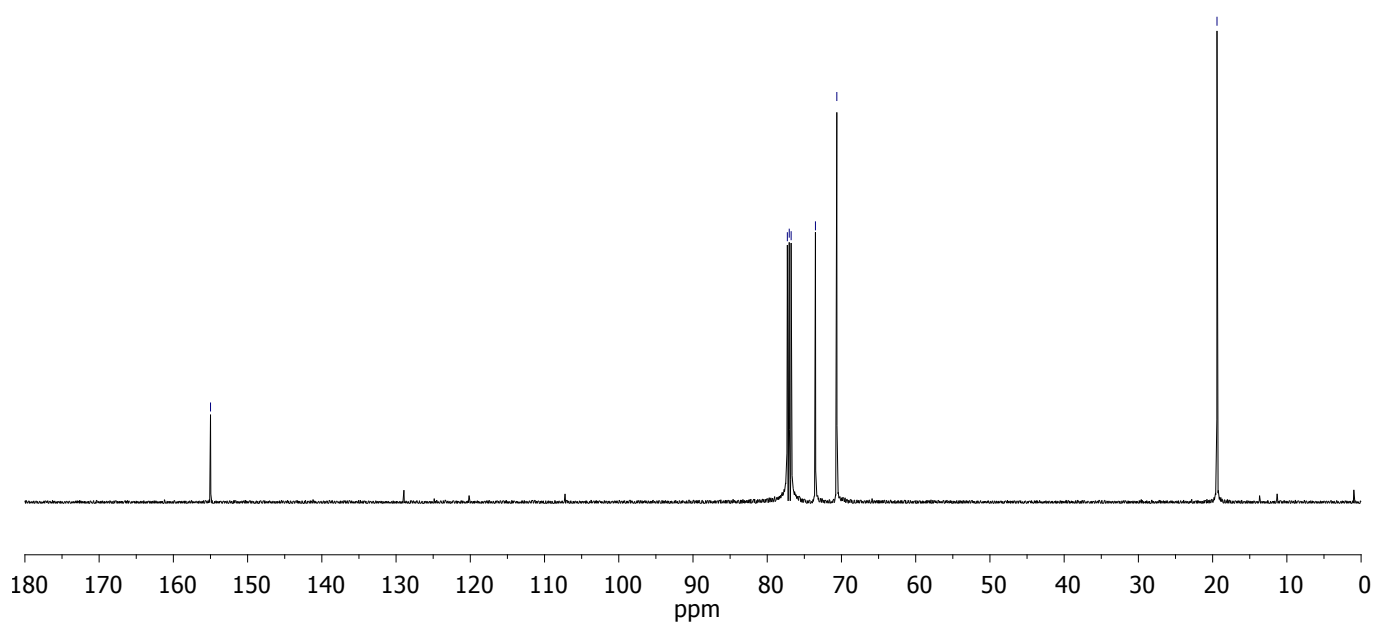

NMR Spectra for 1,2-butylene carbonate **10c** in CDCl<sub>3</sub>

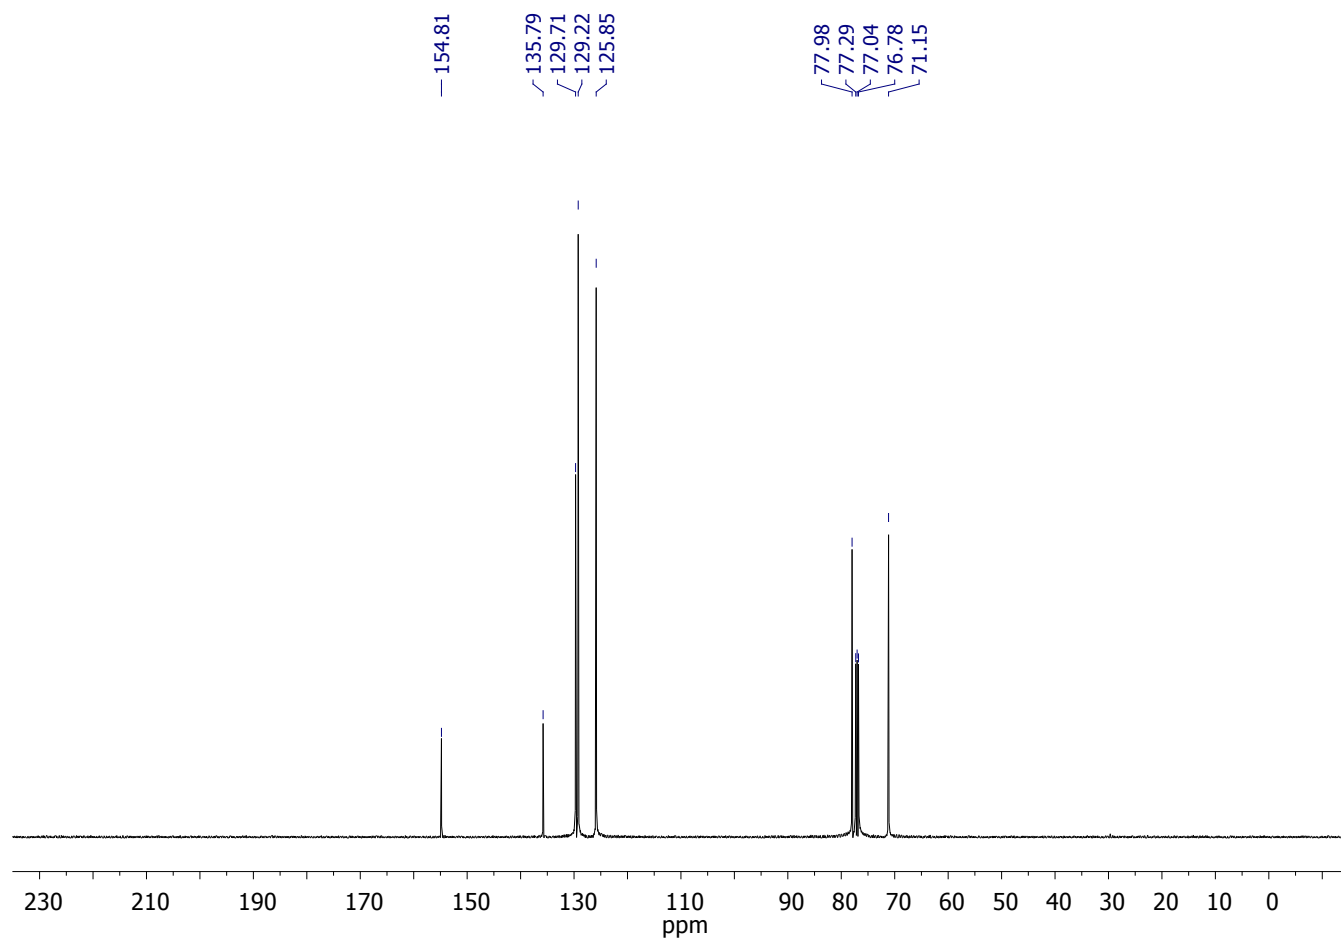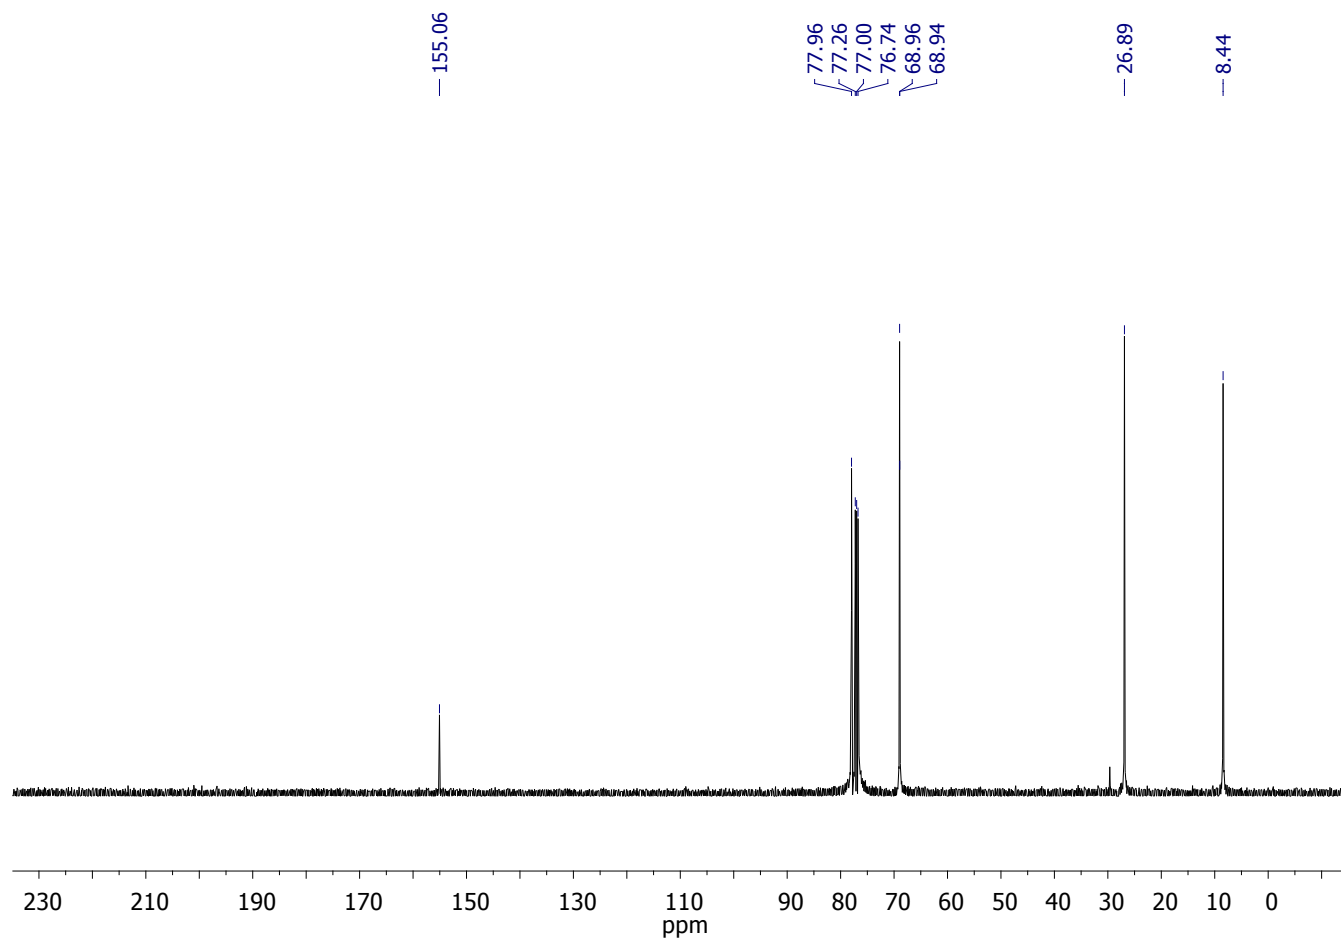

NMR Spectra for 1,2-hexylene carbonate **10d** in CDCl<sub>3</sub>

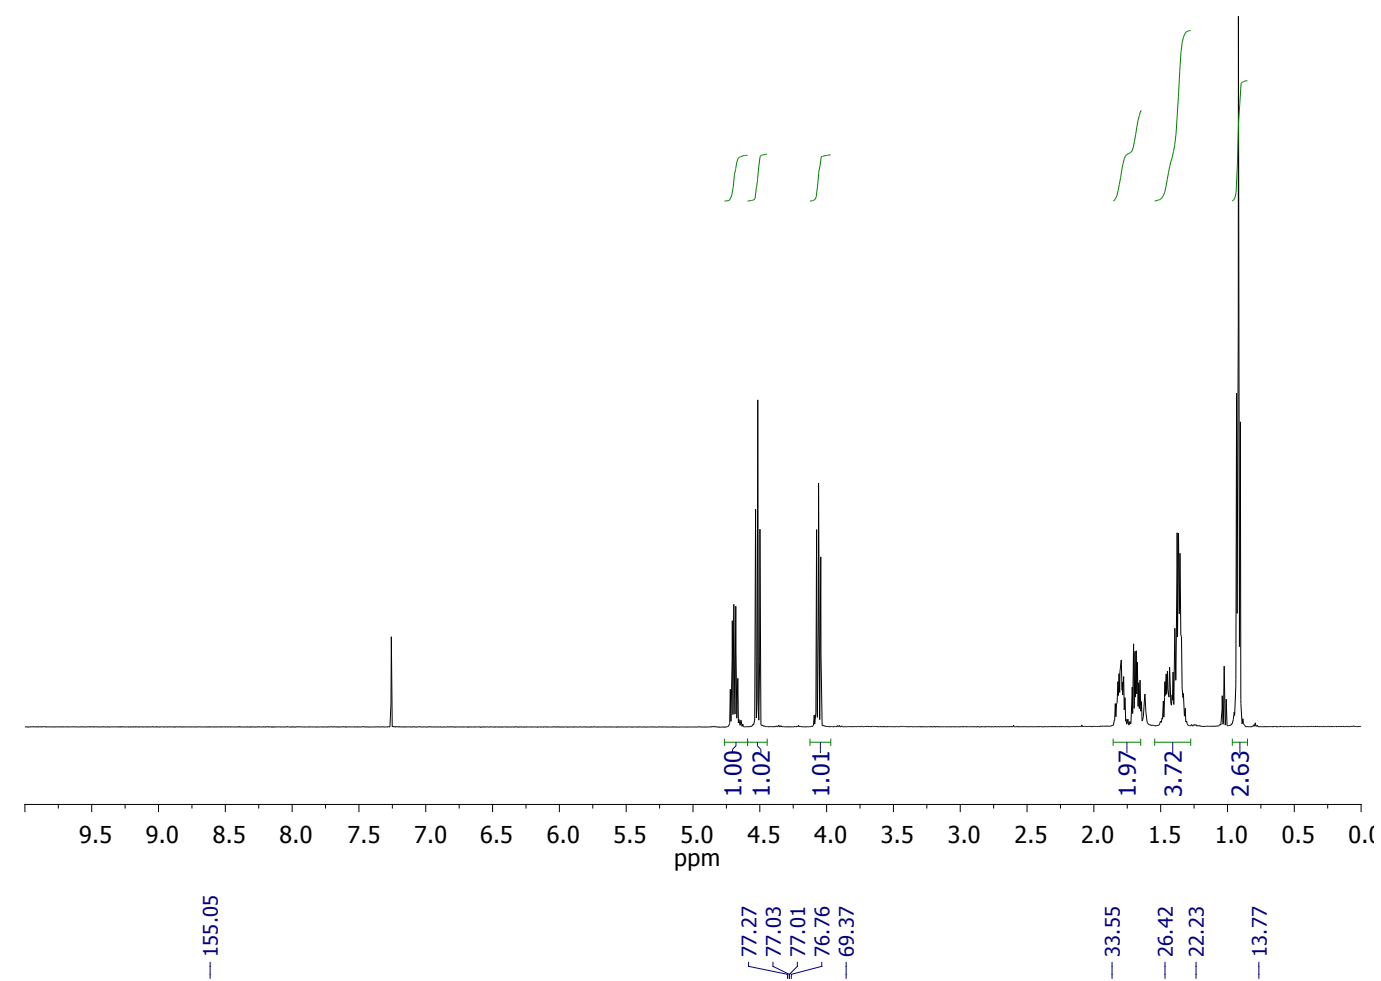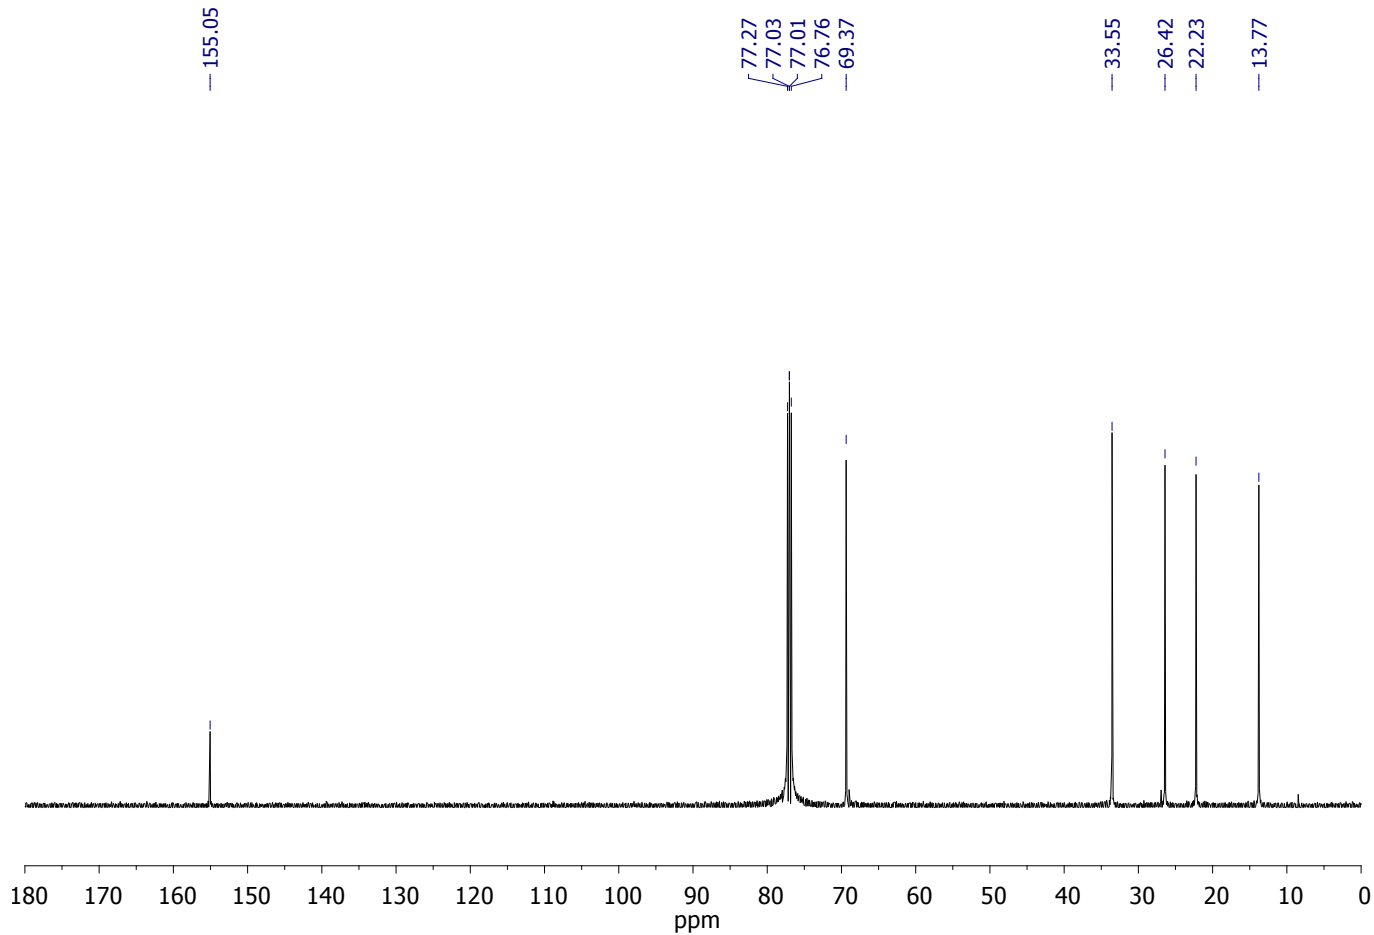

NMR Spectra for 1,2-decylene carbonate **10e** in CDCl<sub>3</sub>

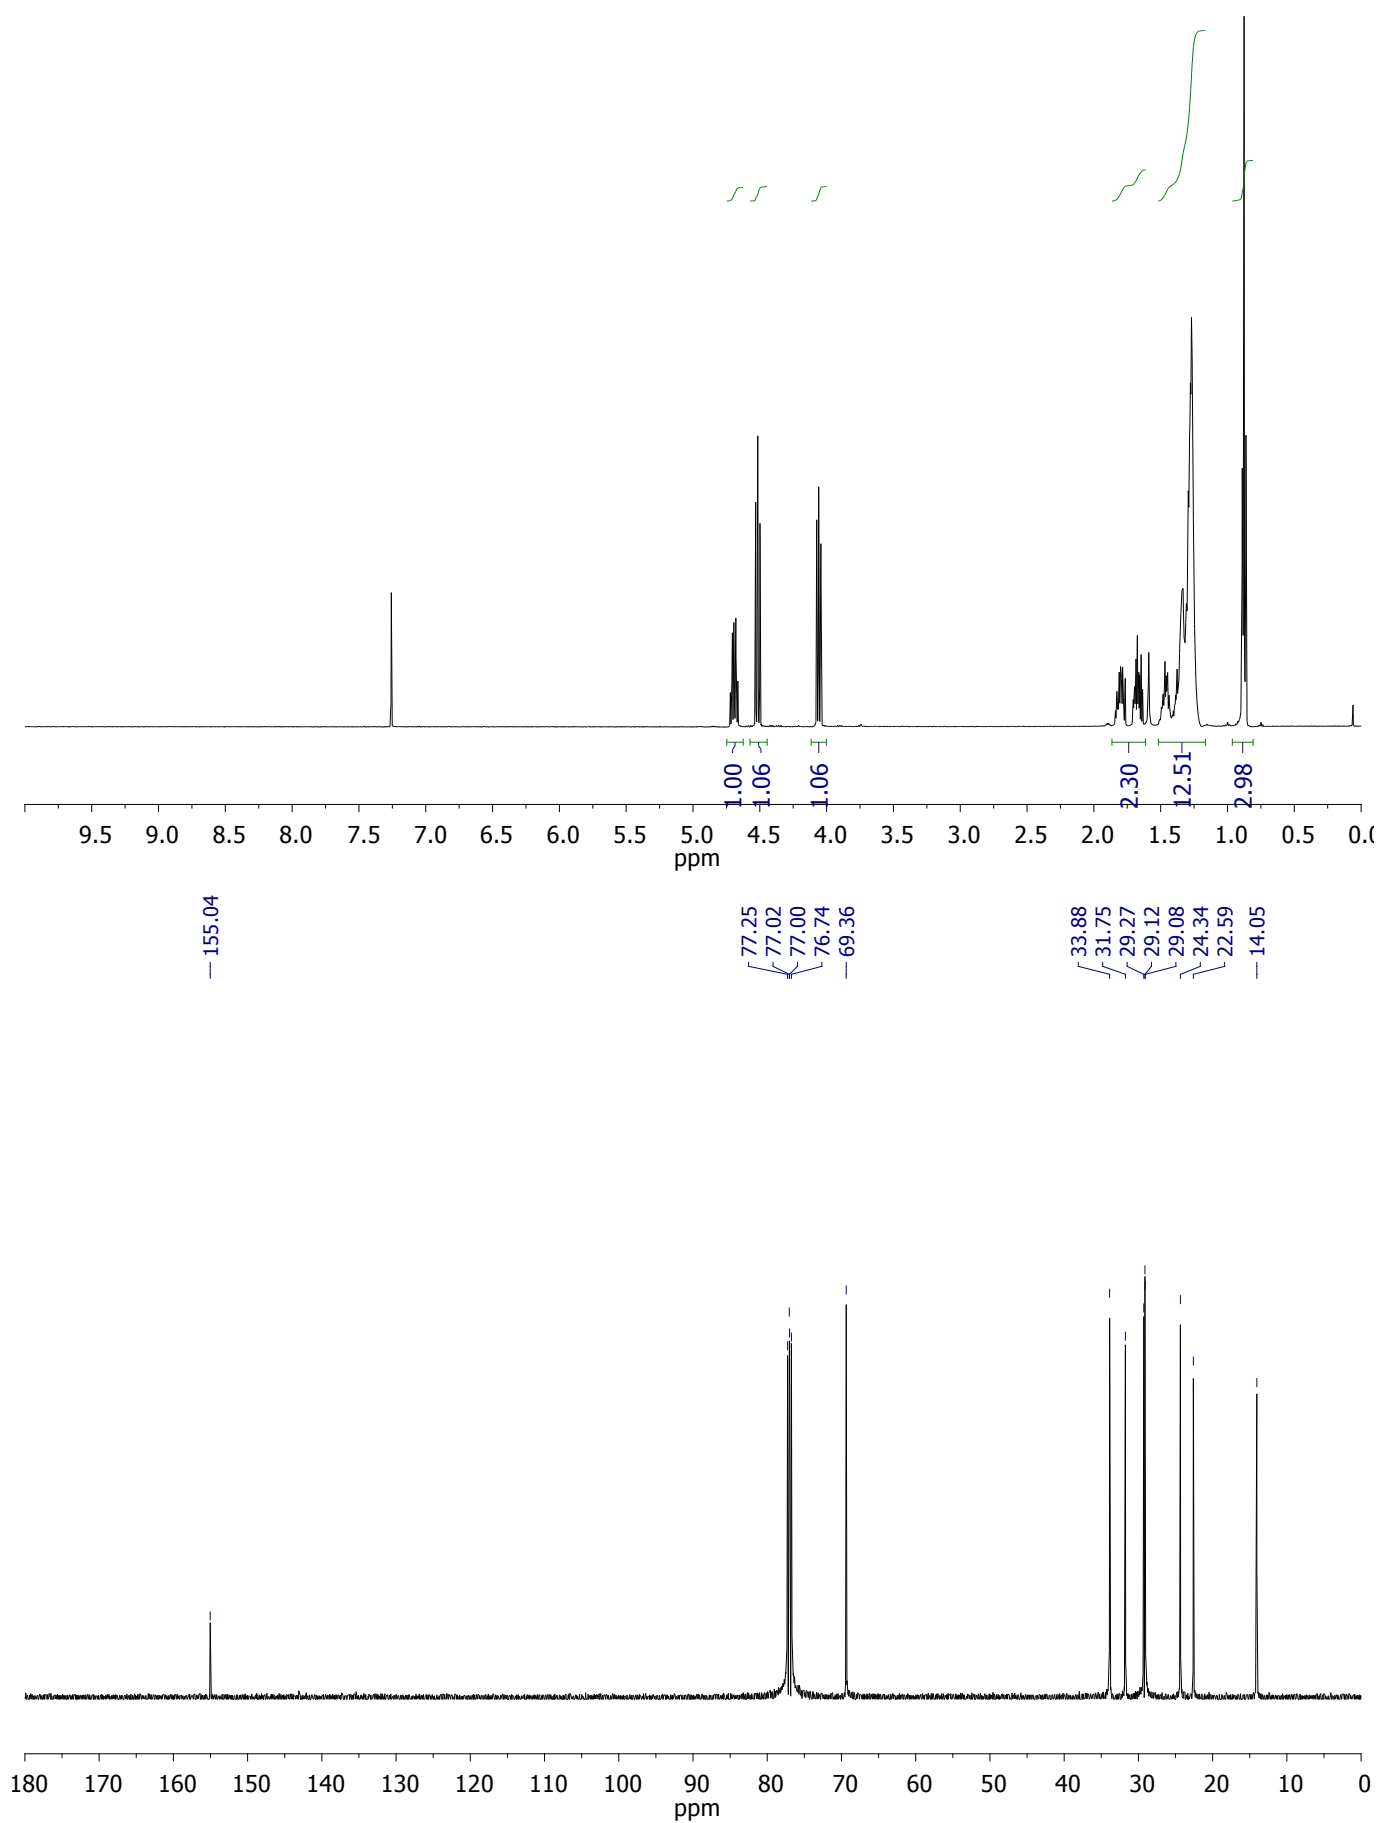

NMR Spectra for 4-chlorostyrene carbonate **10f** in CDCl<sub>3</sub>

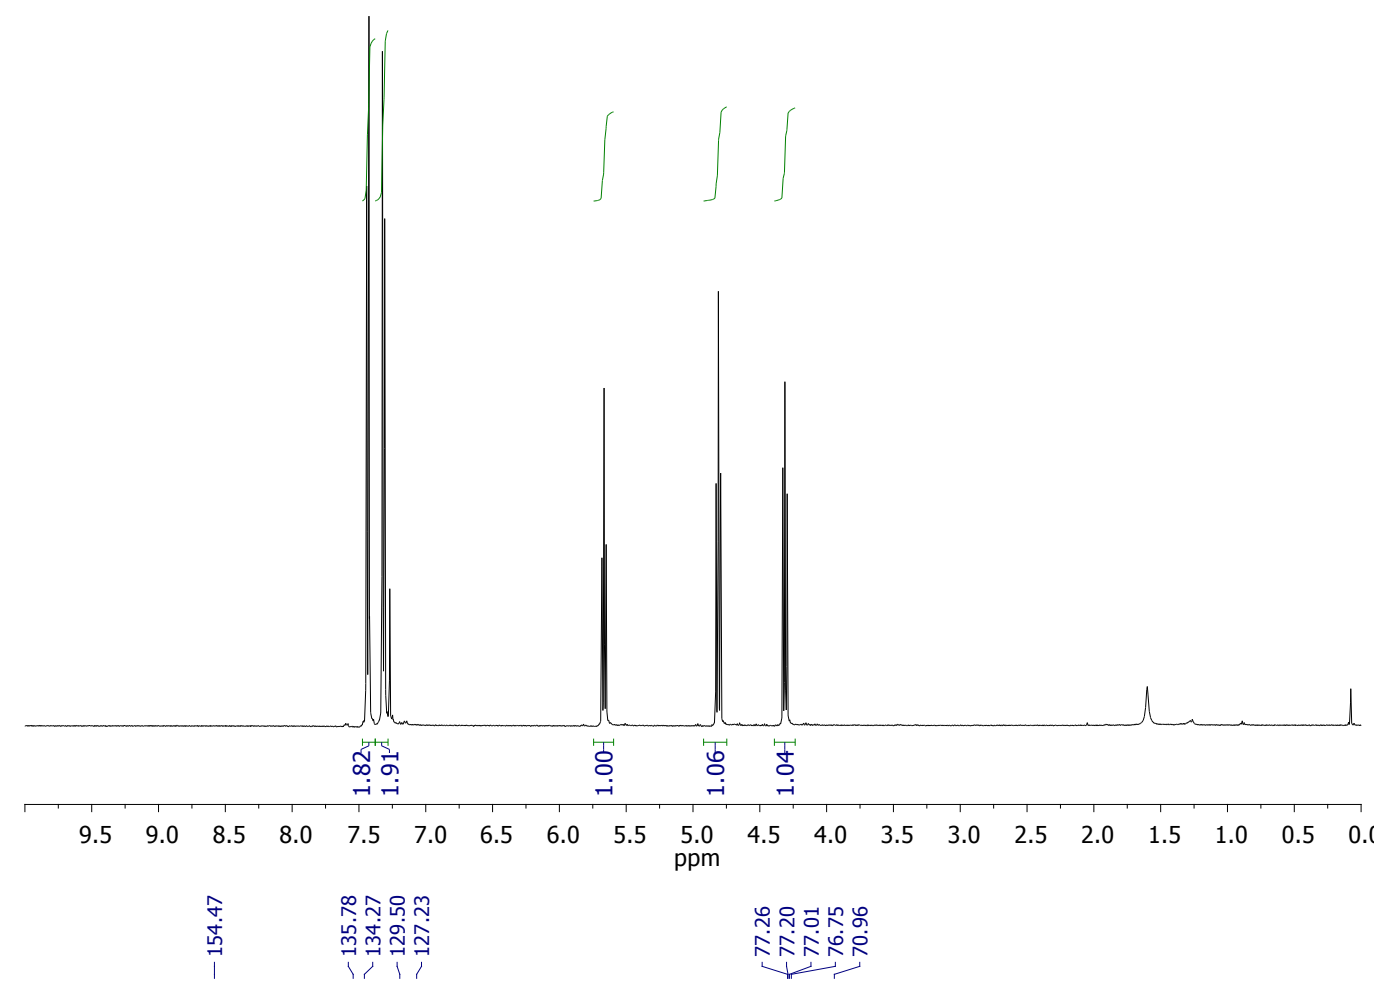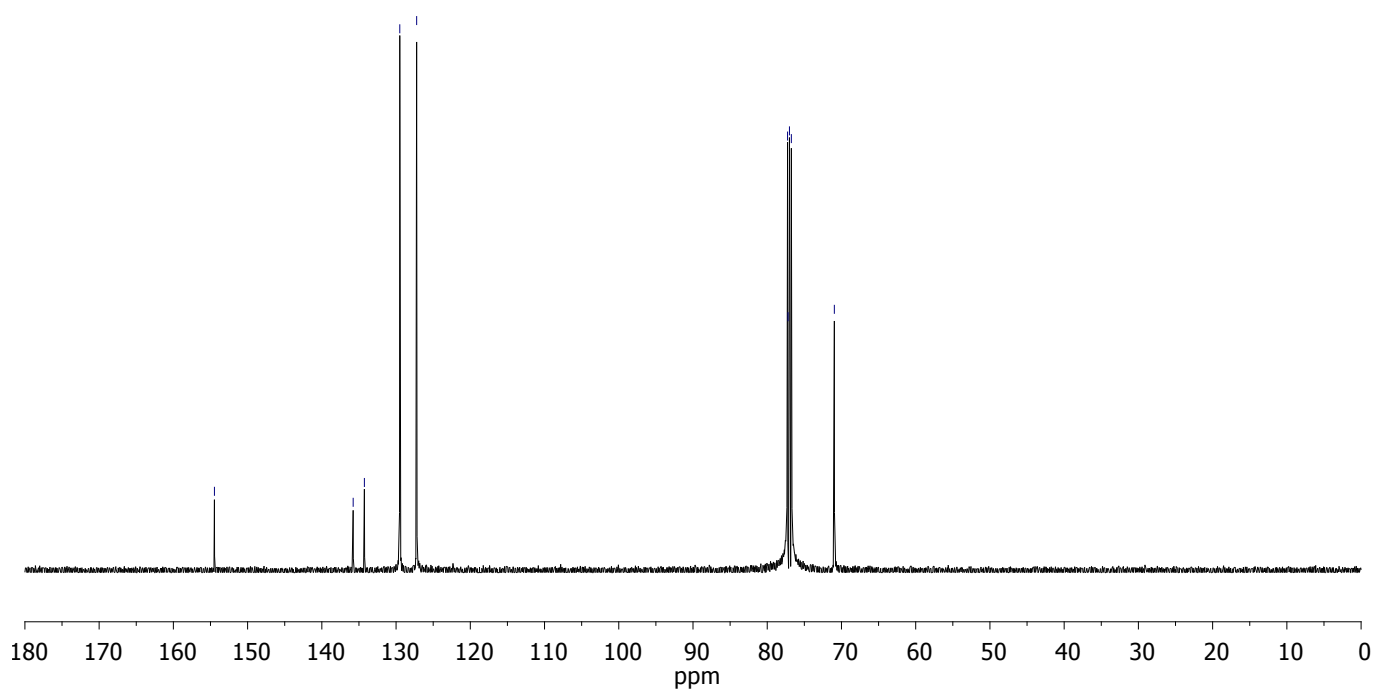

NMR Spectra for 4-bromostyrene carbonate **10g** in CDCl<sub>3</sub>

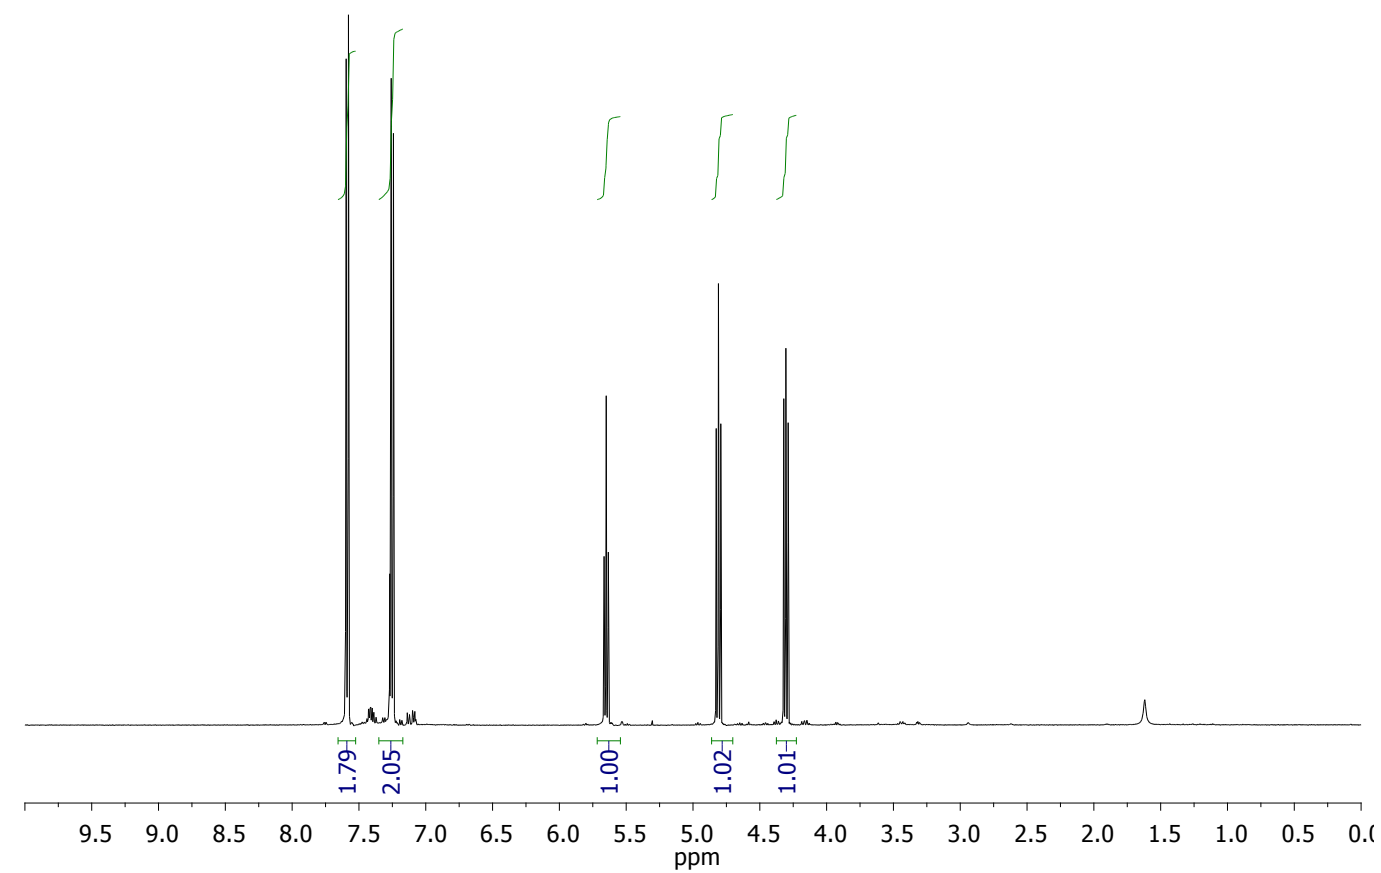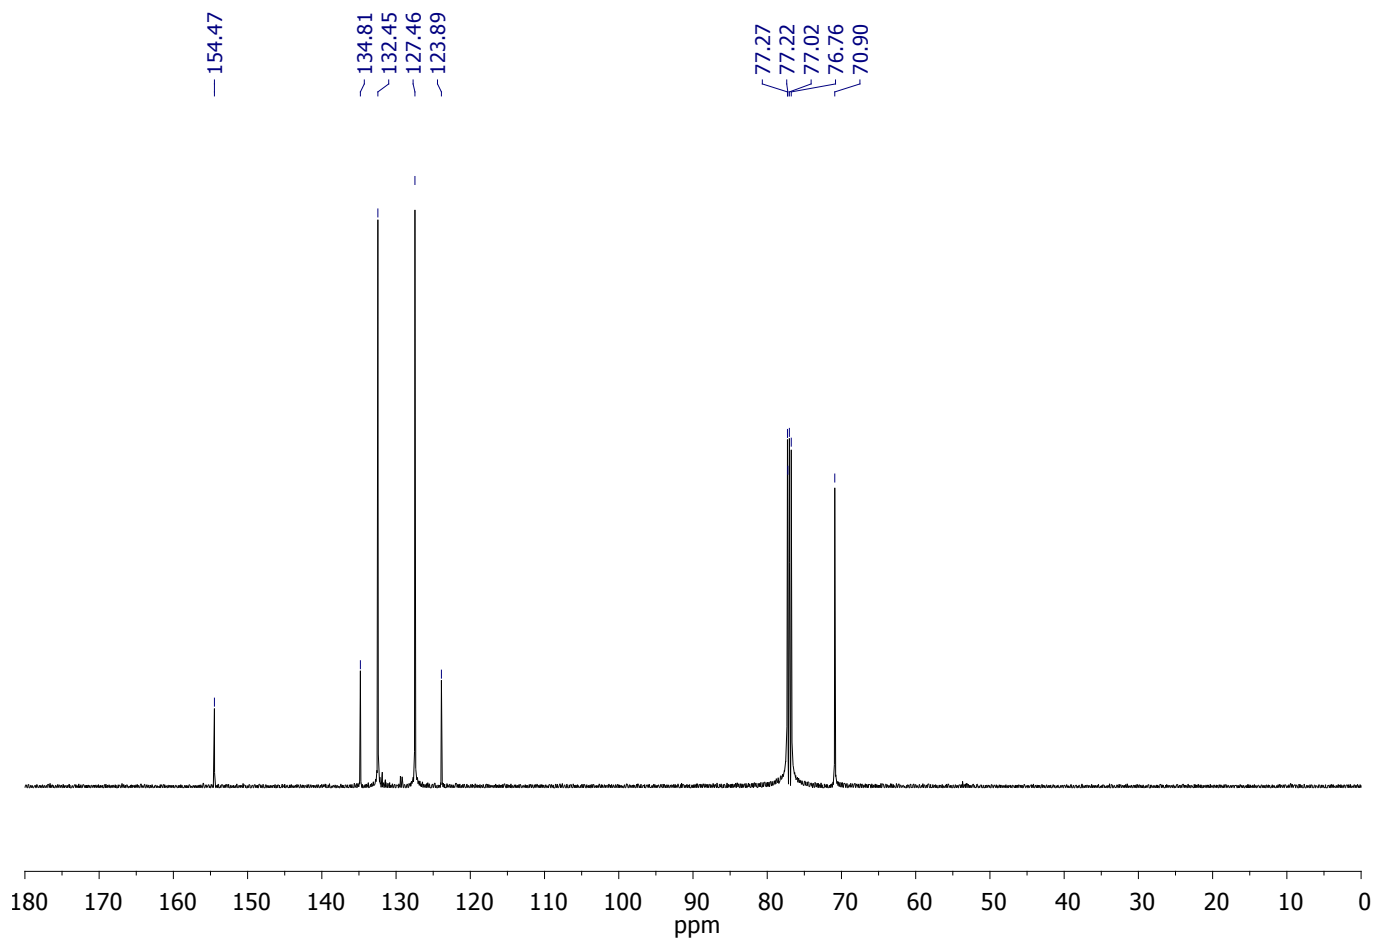

NMR Spectra for glycerol carbonate **10h** in DMSO- $d_6$

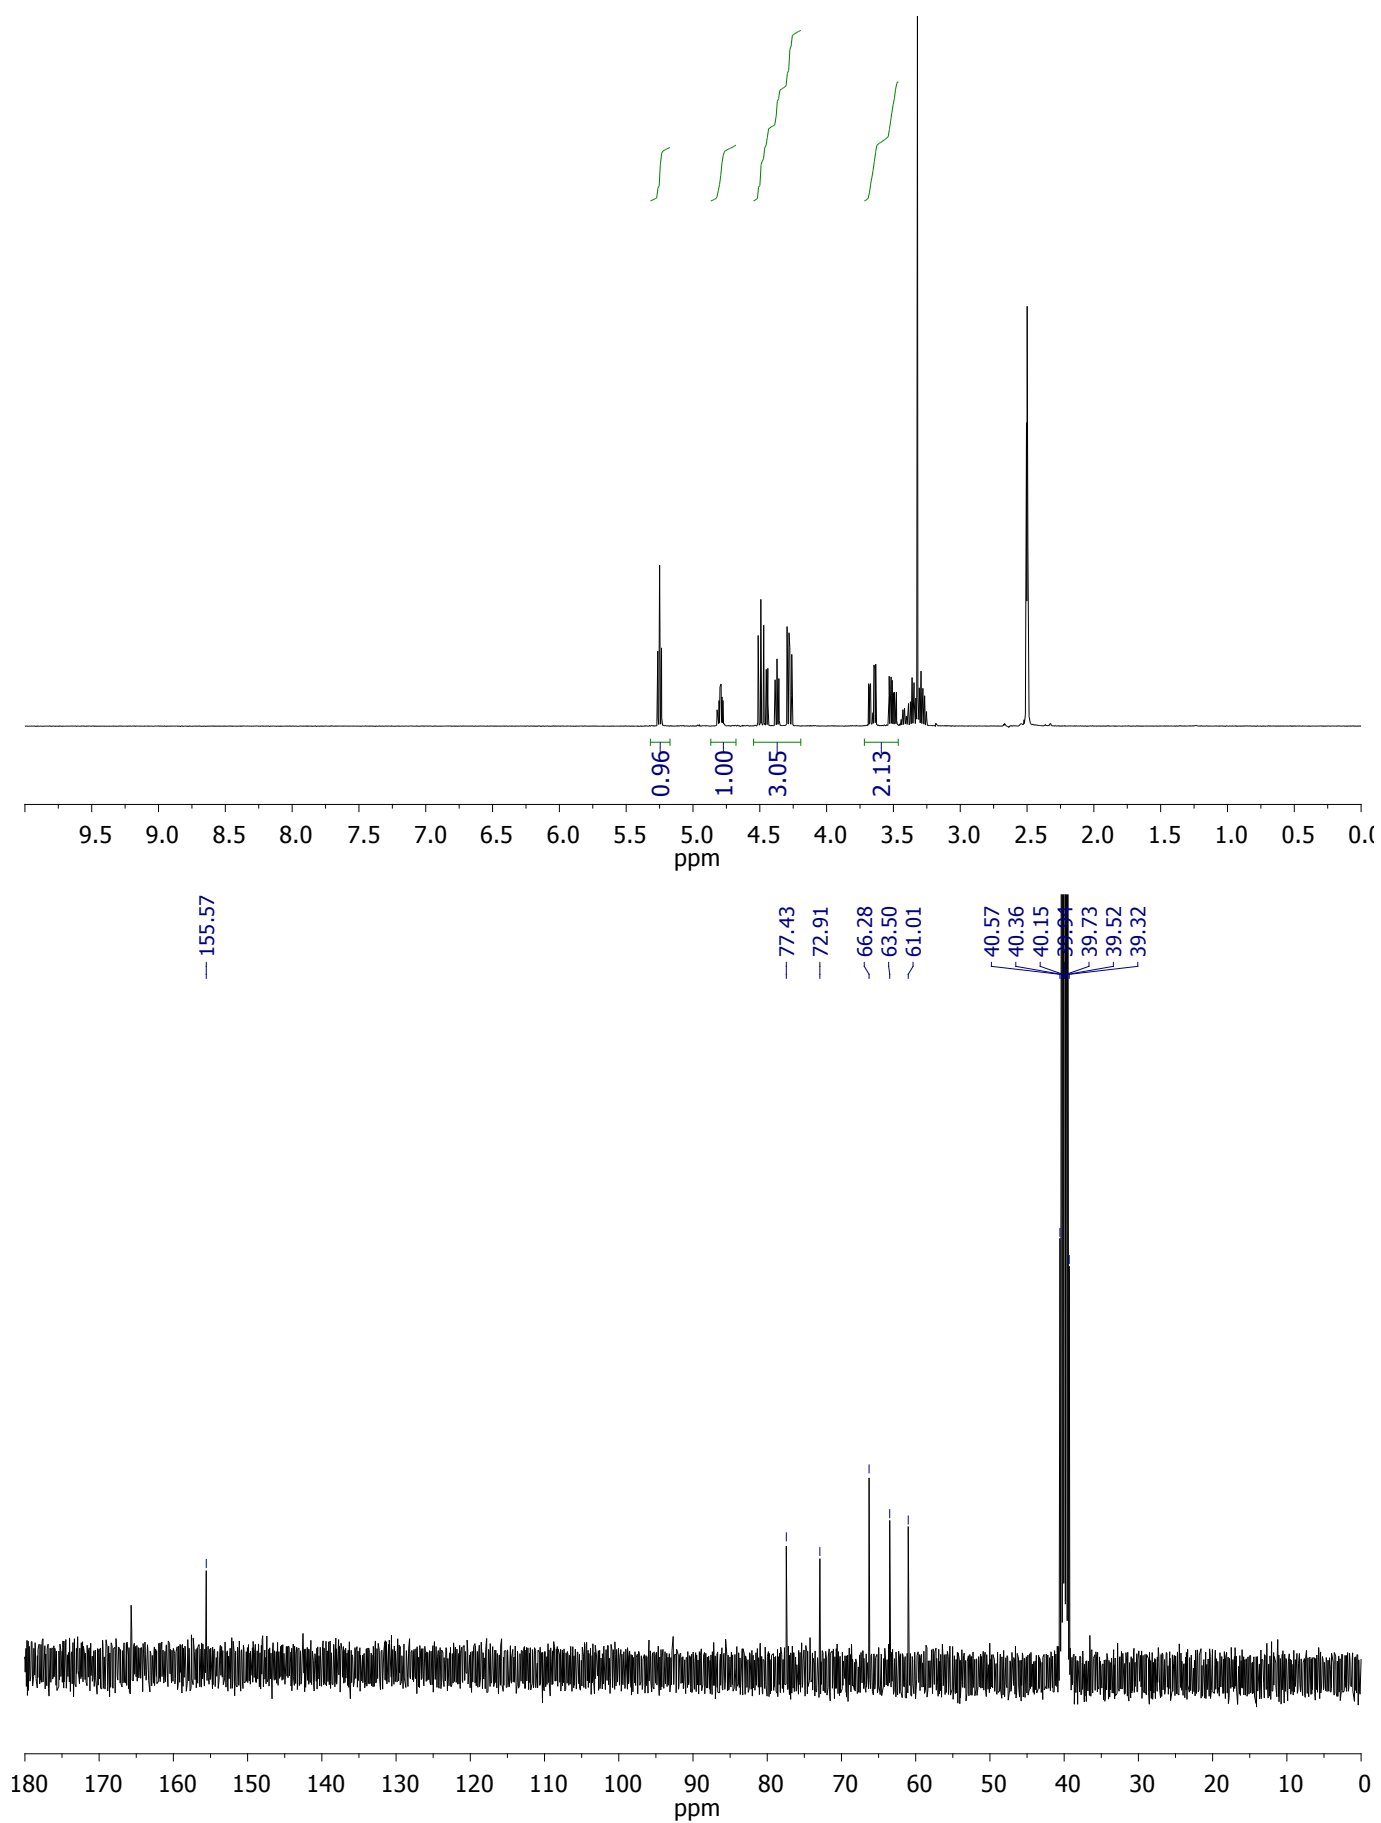

NMR Spectra for 3-chloropropylene carbonate **10i** in CDCl<sub>3</sub>

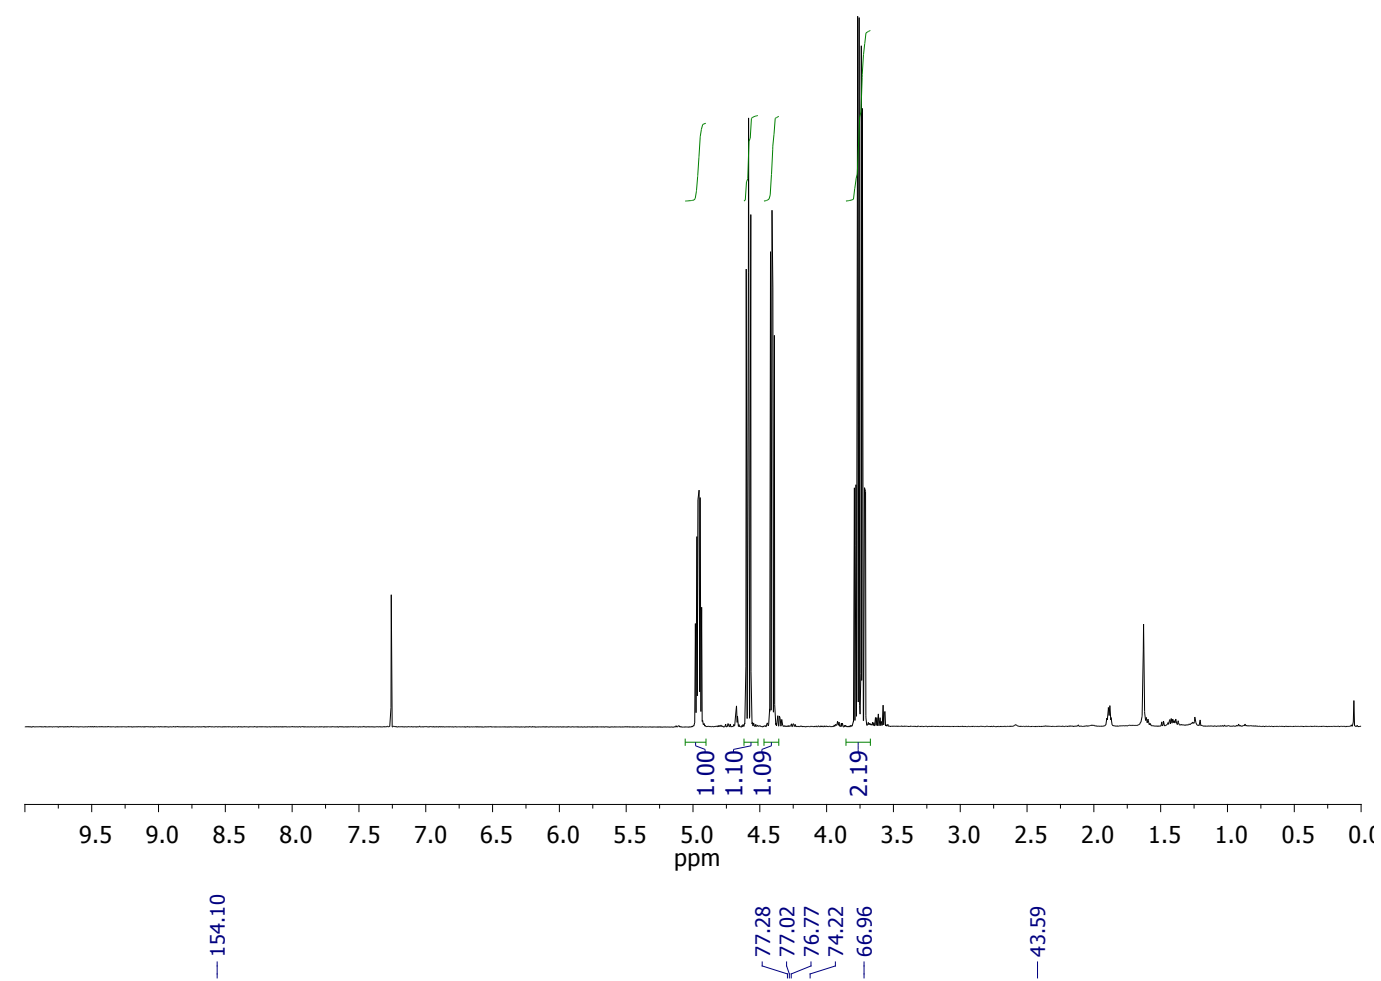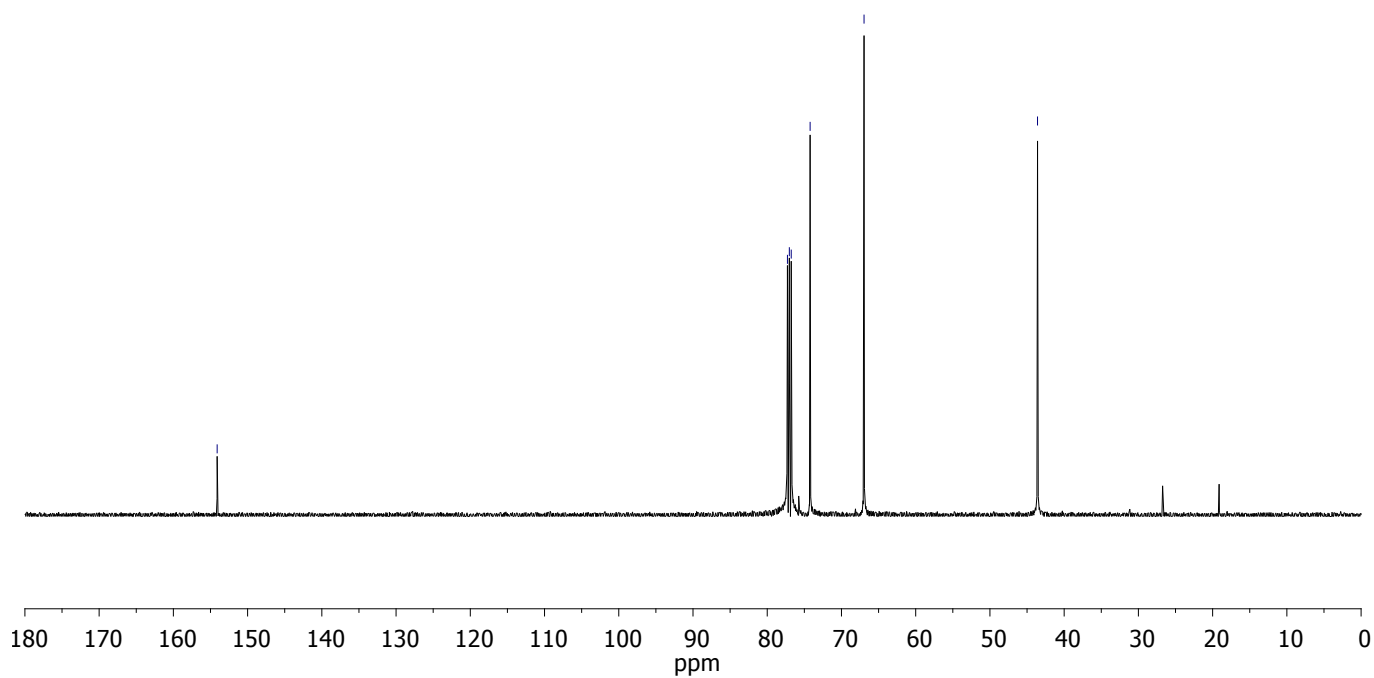



NMR Spectra for 3-phenoxypropylene carbonate **10j** in CDCl<sub>3</sub>

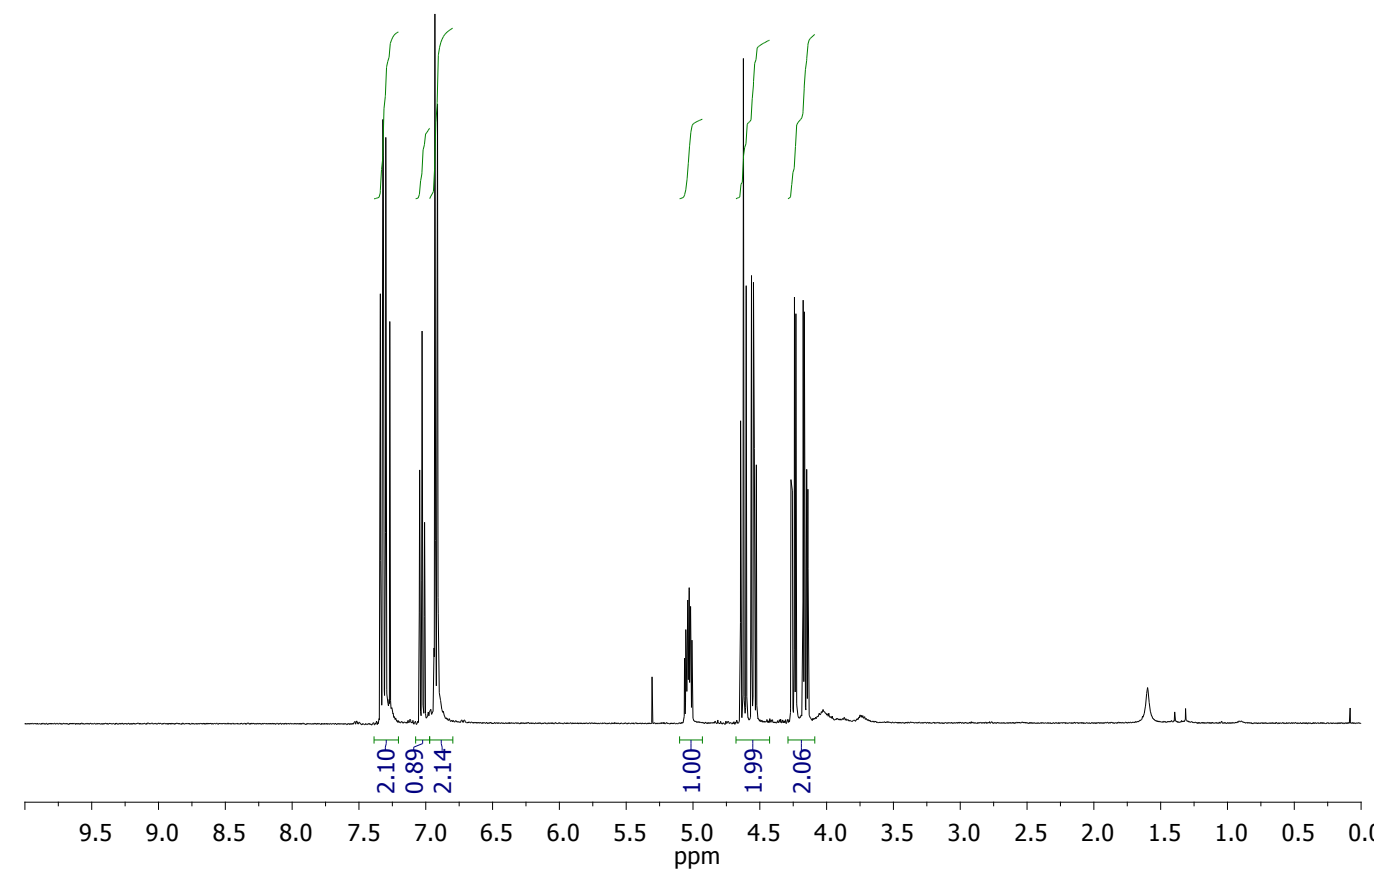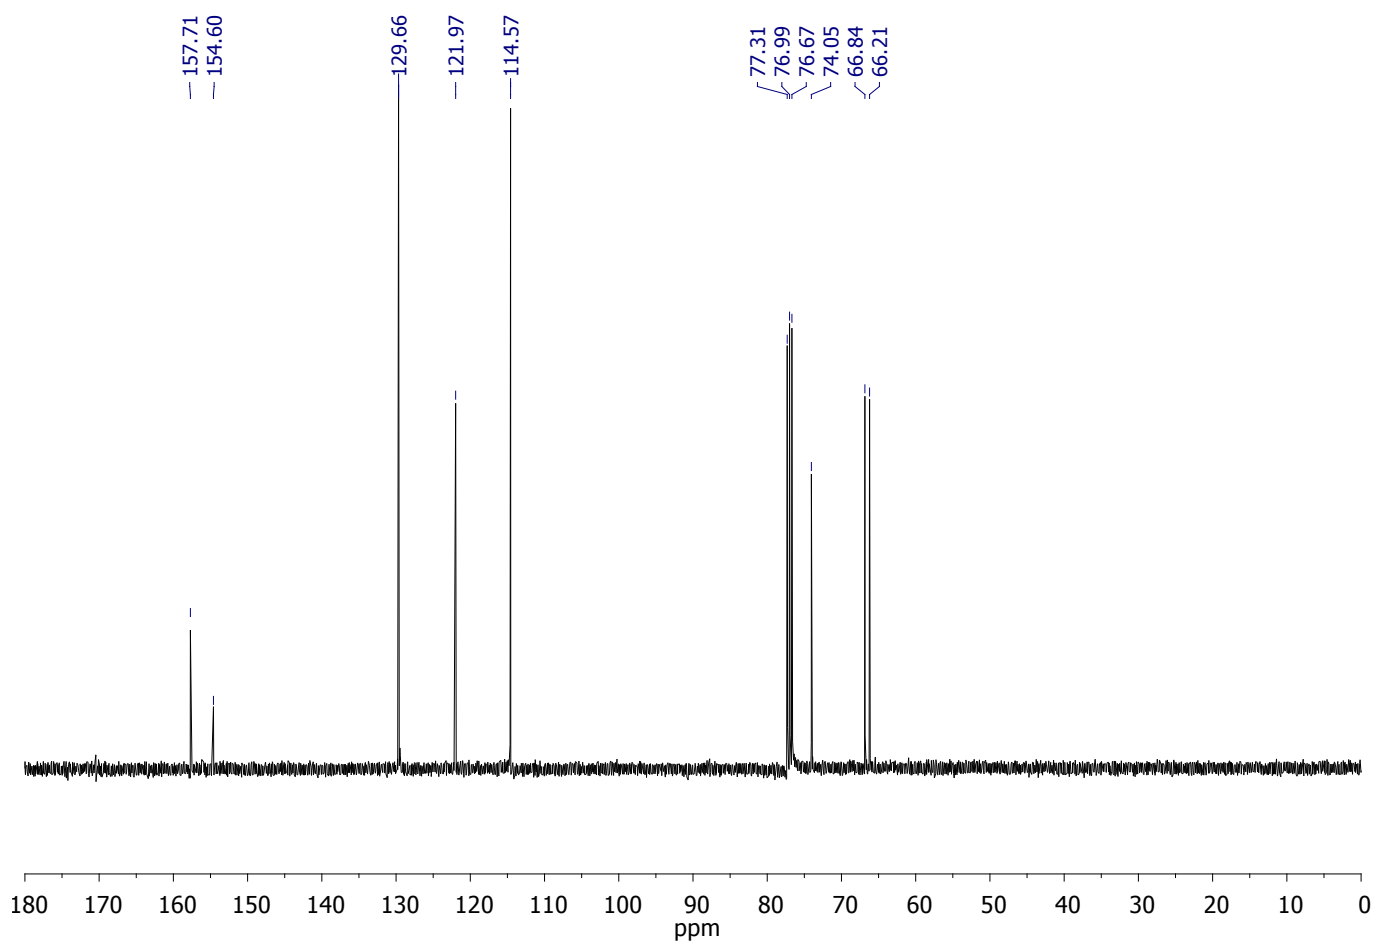

NMR Spectra for cyclopentene carbonate **12a** in CDCl<sub>3</sub>

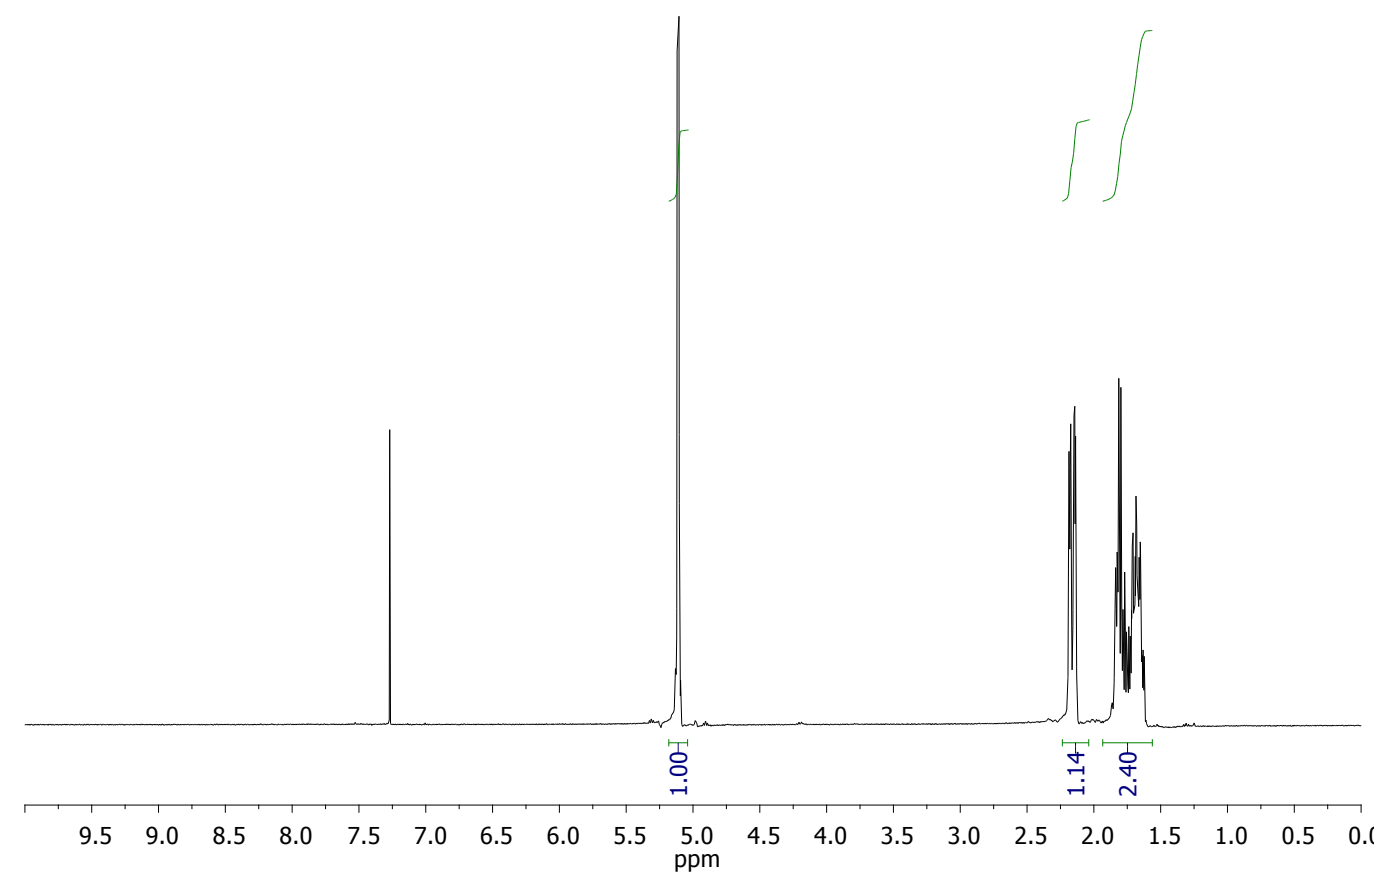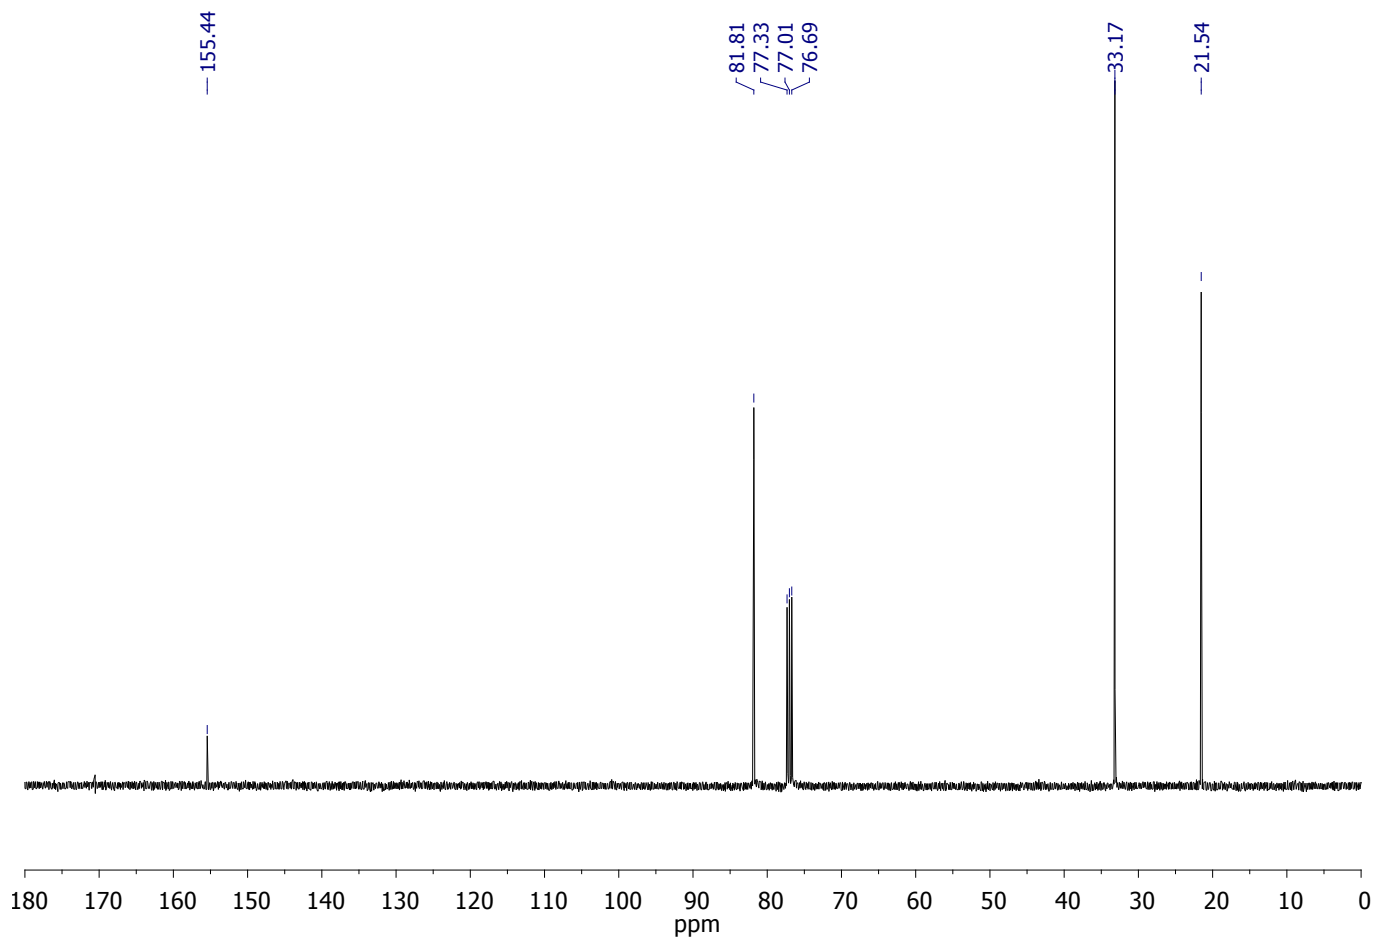

NMR Spectra for *cis*-2,3-butene carbonate **12b** in CDCl<sub>3</sub>

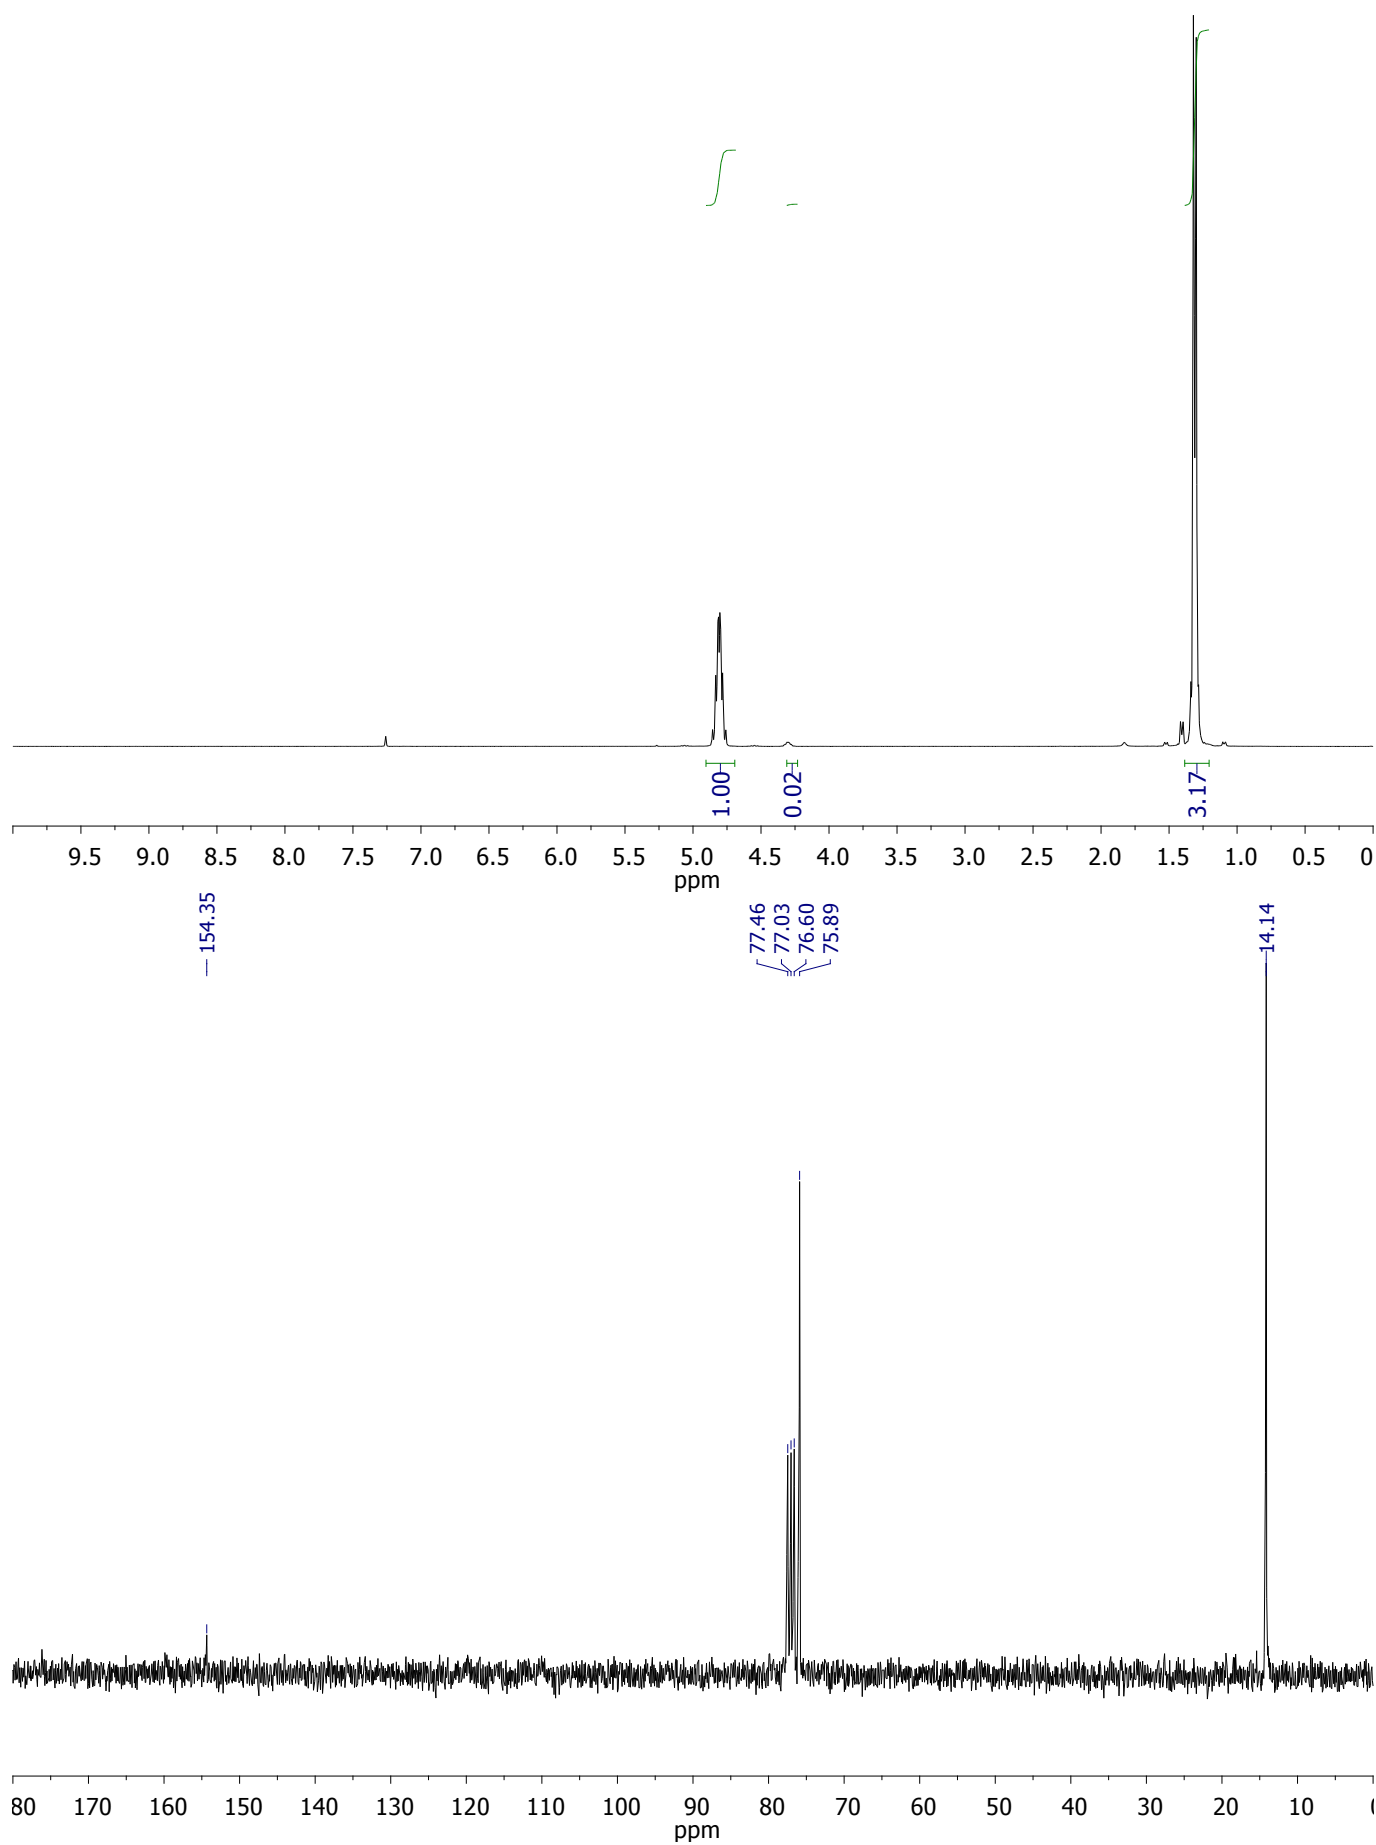

NMR Spectra for *trans*-2,3-butene carbonate **12c** in CDCl<sub>3</sub>

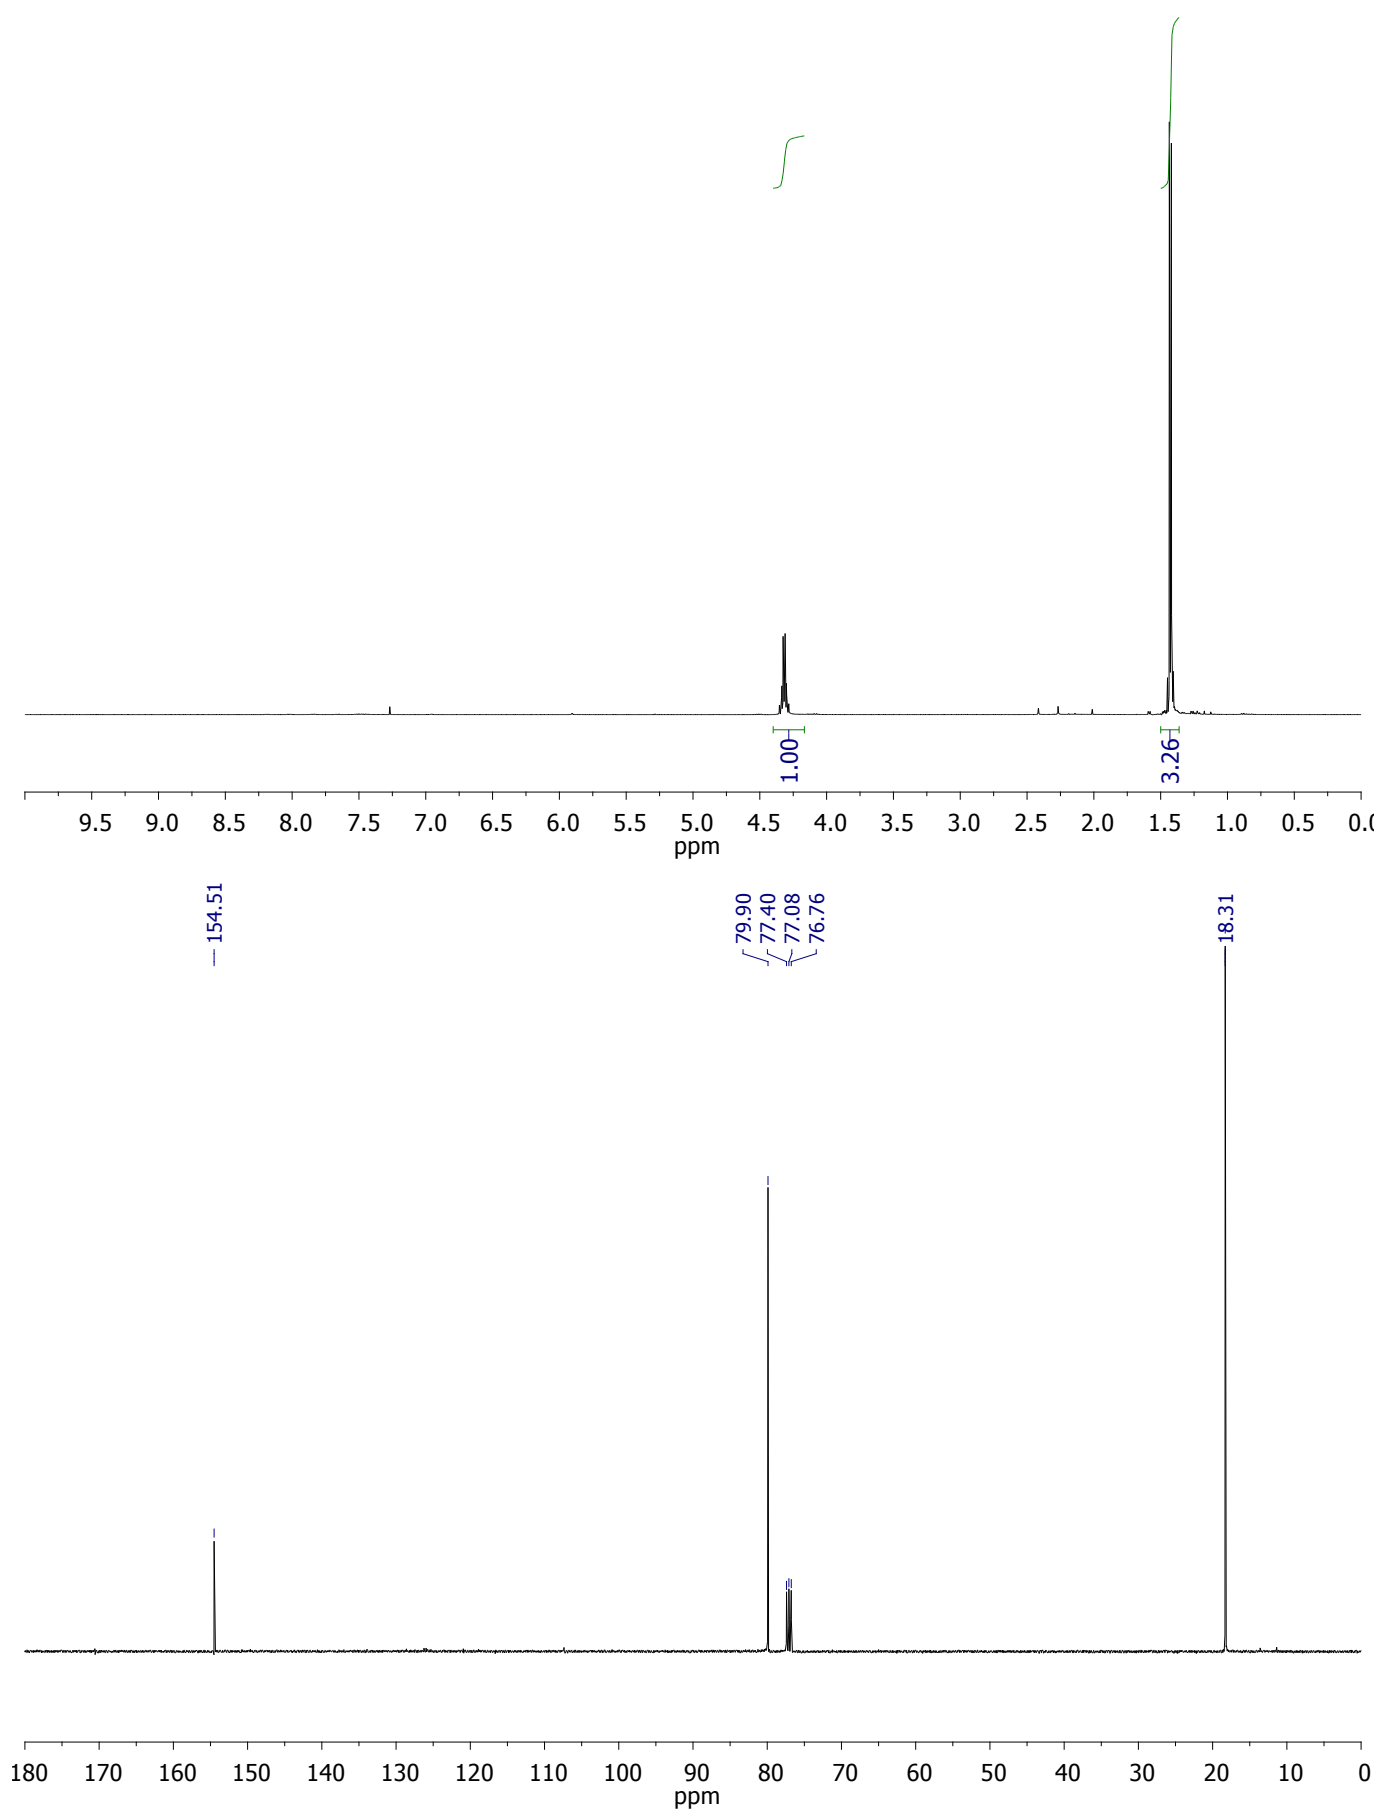

NMR Spectra for *trans*-1,2-diphenylethylene carbonate **12d** in CDCl<sub>3</sub>

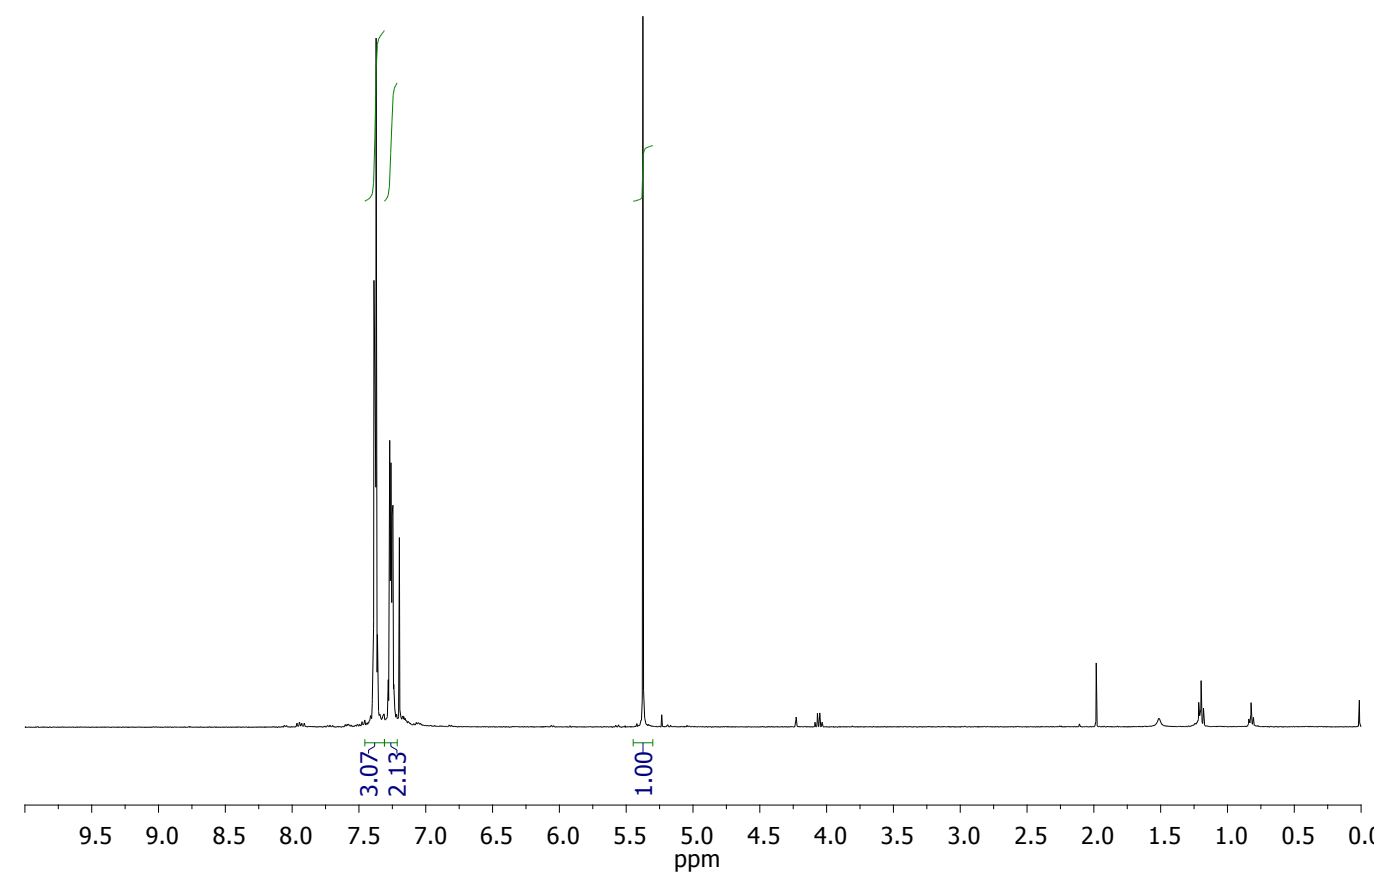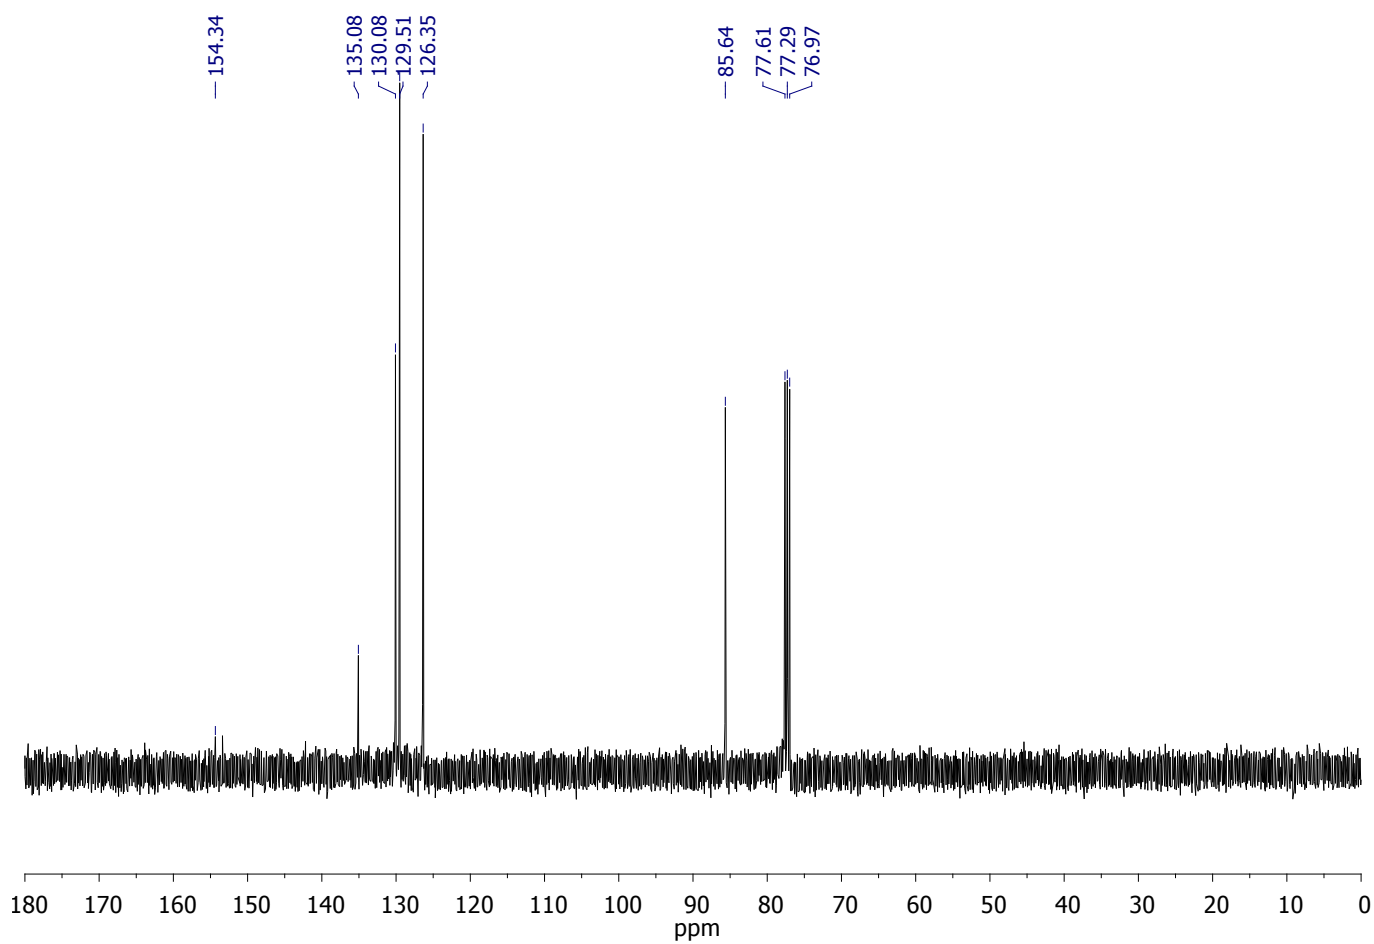

NMR Spectra for *trans*-1-phenyl-2-methylethylene carbonate **12e** in CDCl<sub>3</sub>

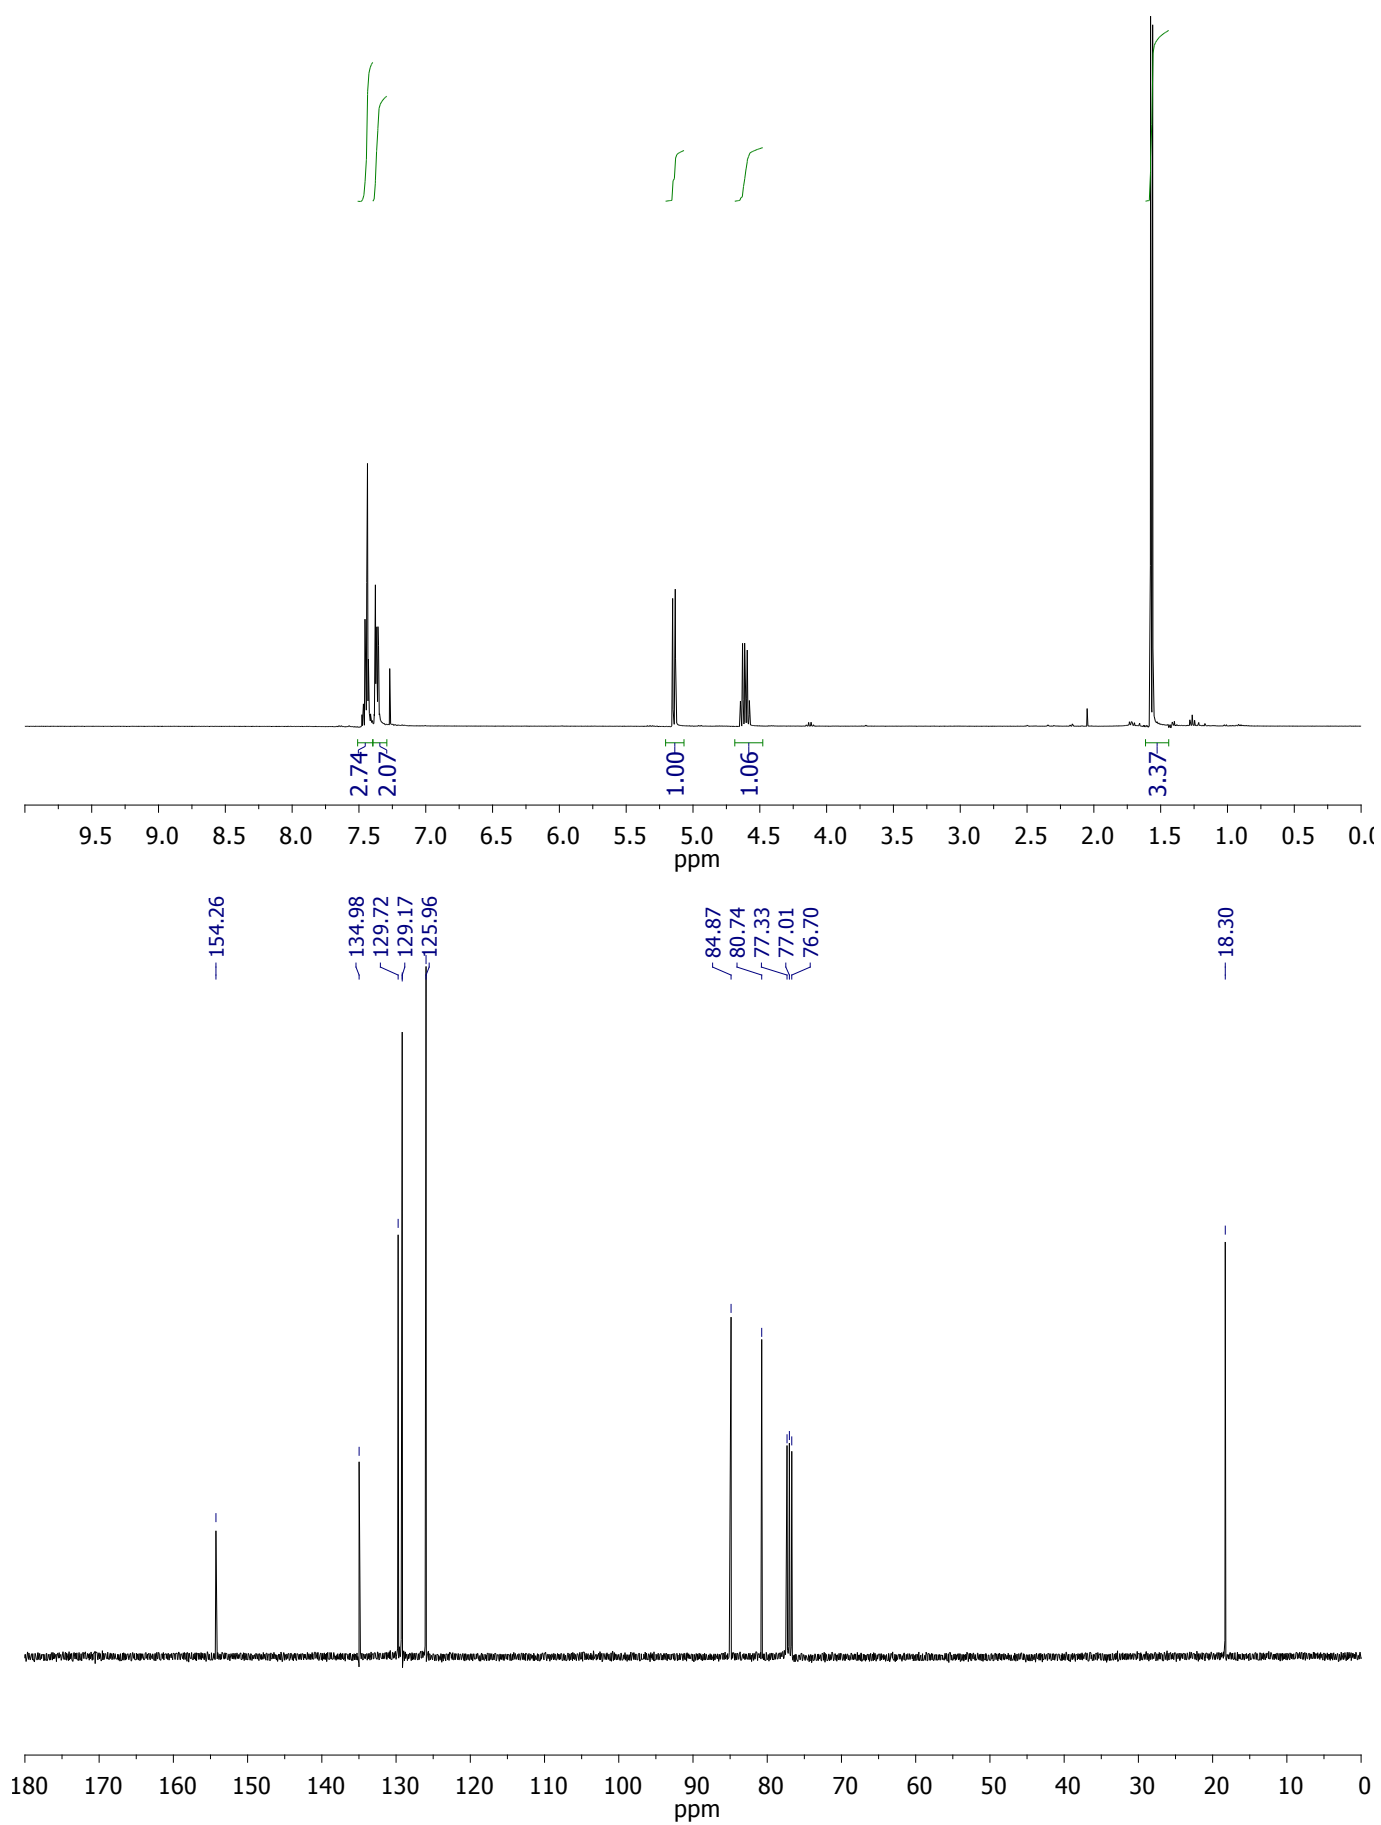

$^1\text{H}$  NMR spectrum for polyether-polycarbonate **12f** derived from CHO and  $\text{CO}_2$  in  $\text{CDCl}_3$

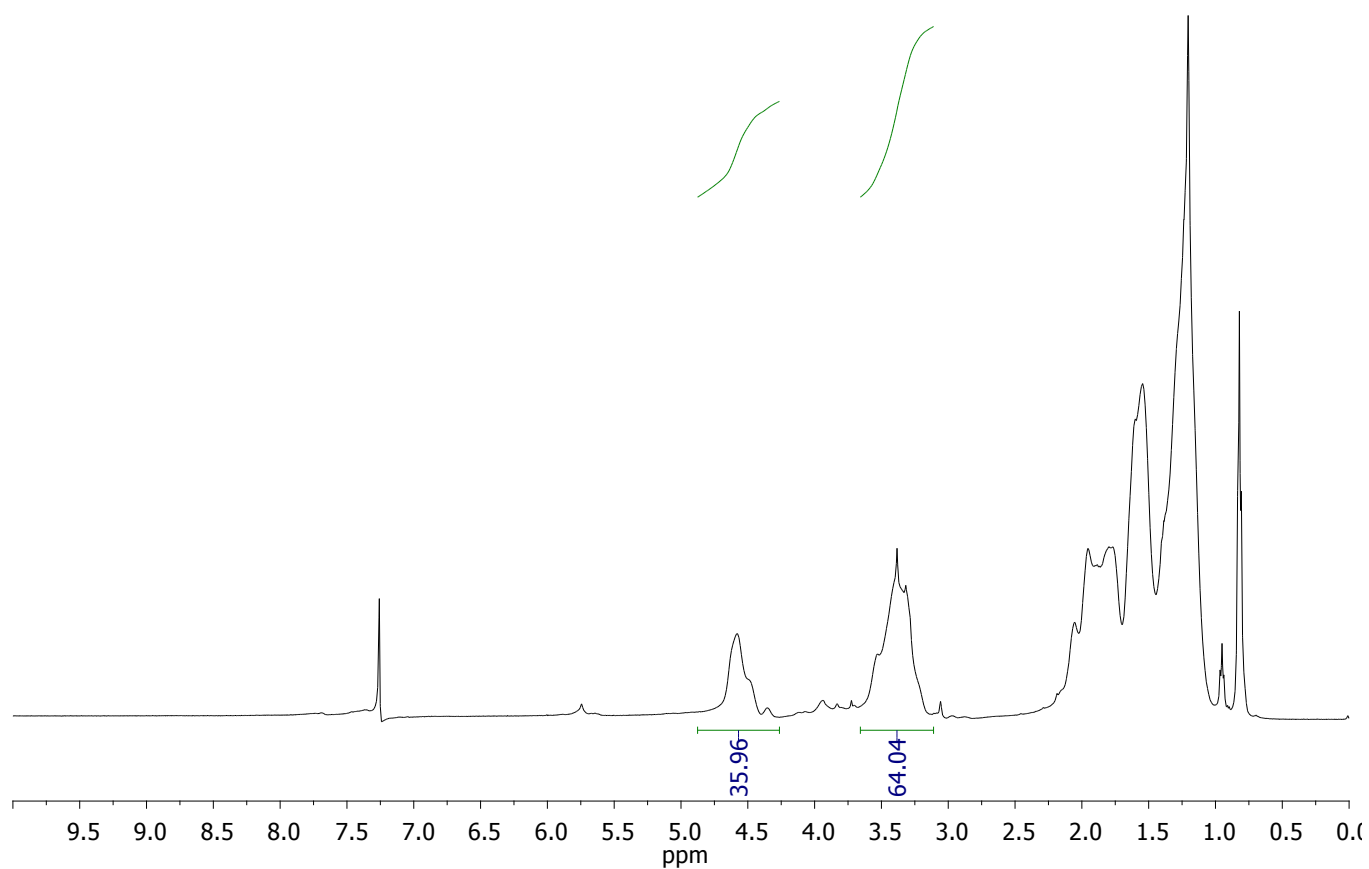

IR NMR spectrum for polyether-polycarbonate **12f** derived from CHO and  $\text{CO}_2$

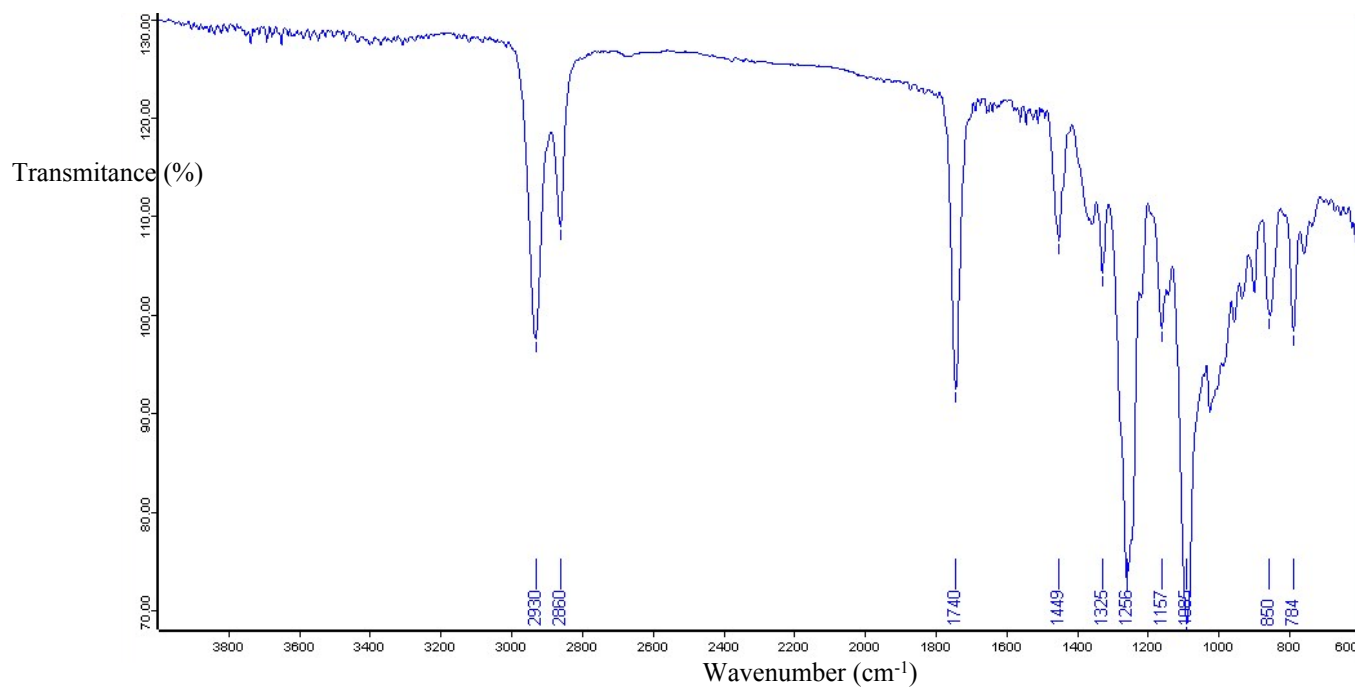

## References

1. (a) J. A. Castro-Osma, C. Alonso-Moreno, A. Lara-Sánchez, J. Martínez, M. North and A. Otero, *Catal. Sci. Technol.*, 2014, **4**, 1674; (b) J. Martínez, J. A. Castro-Osma, A. Earlam, C. Alonso-Moreno, A. Otero, A. Lara-Sánchez, M. North and A. Rodríguez-Diéguez, *Chem. Eur. J.*, 2015, **21**, 9850; (c) J. Martínez, J. A. Castro-Osma, C. Alonso-Moreno, A. Rodríguez-Diéguez, M. North, A. Otero and A. Lara-Sánchez, *ChemSusChem*, 2017, **10**, 1175; (d) D. O. Meléndez, A. Lara-Sánchez, J. Martínez, X. Wu, A. Otero, J. A. Castro-Osma, M. North and R. S. Rojas, *ChemCatChem*, 2018, **10**, 2271; (e) F. de la Cruz-Martínez, J. Martínez, M. A. Gaona, J. Fernández-Baeza, L. F. Sánchez-Barba, A. M. Rodríguez, J. A. Castro-Osma, A. Otero and A. Lara-Sánchez, *ACS Sustain. Chem. Eng.*, 2018, **6**, 5322.
